# Supplementary material
Source: publisher site journal article supplement (https://www.dovepress.com/article/397067)
Supplement: Supplementary file 1 [file get_supplementary_file.php]

**Supplementary Information**

[**Text S1. Calculation method for the genetic score** 1](#_Toc118476147)

**Tables**

[**Table S1. Obesity phenotype and asthma control** 1](#_Toc118476148)

[**Table S2. SNPs of BMI (p-value of meta-analysis< 5×10-8)** 2](#_Toc118476149)

[**Table S3. SNPs of WHtR (p-value of meta-analysis< 5×10-8)** 6](#_Toc118476150)

[**Table S4. SNPs of asthma (p-value of meta-analysis< 5×10-8)** 10](#_Toc118476151)

**Figures**

[**Figure S1. Quality Control (QC) flow chart** 14](#_Toc118476152)

[**Figure S2. Q-Q plot and Manhattan plot of the GWAS meta-analyses results for BMI and WHtR** 15](#_Toc118476153)

[**Figure S3. Q-Q plot and Manhattan plot of the GWAS meta-analyses results for asthma** 16](#_Toc118476154)

[**Figure S4. Expression quantitative trait loci (eQTL) violin plots between genotypes of BMI-associated risk SNPs and gene expression from the Genotype-Tissue Expression (GTEx)** 17](#_Toc118476155)

[**Figure** **S5. eQTL violin plots between genotypes of WHtR-associated risk SNPs and gene expression from the GTEx** 18](#_Toc118476156)

[**Figure S6. eQTL violin plots between genotypes of asthma-associated SNPs and gene expression from the GTEx** 19](#_Toc118476157)

[**Figure S7. Top 10 biological process (BP) terms with the highest p-value by gene ontology (GO) enrichment analysis** 20](#_Toc118476158)

[**Figure S8. Top 10 pathway with the highest p-value by pathway enrichment analysis** 21](#_Toc118476159)

[**Figure S9. The performance of predictive model of poorly controlled asthma by general obesity (presented as BMI) related traits and genetics scores** 22](#_Toc118476160)

[**Figure** **S10. The performance of predictive model of poorly controlled asthma by central obesity (presented as WHtR) related traits and genetics scores** 23](#_Toc118476161)

**Text S1. Calculation method for the genetic score**

the scores were constructed with the following rule: If the dominant model was significant, it was firstly considered. However, if the dominant model was insignificant, the significant additive model would be selected. If the dominant or additive model was not significant, the recessive model was chosen. A1 is the minor allele, and A2 is the major allele. In dominant model, the coefficient of ' A1A1 + A1A2' and ' A2A2' were 1 and 0 respectively. In recessive model, the coefficient of ' A1A1' and 'A1A2+ A2A2' were 1 and 0 respectively. In additive model, the coefficient of ' A1A1' , ' A1A2' and ' A2A2' were 2, 1, 0 respectively.

**Table S1. Obesity phenotype and asthma control**

| **Variable** | **Uncontrolled asthma** | |
| --- | --- | --- |
| **aOR (95% CI)** | **p-value** |
| **BMI** | | |
| BMI |  |  |
| Underweight | 0.56 (0.21, 1.53) | 0.259 |
| Normal | Ref | - |
| Overweight | 1.07 (0.79, 1.44) | 0.655 |
| Obesity | 1.49 (1.09, 2.03) | 0.012 |
| One of the parents has asthma | 1.68 (1.16, 2.42) | 0.006 |
| **WHtR** | | |
| Obesity (ref: non-obesity) | 1.62 (1.22, 2.15) | <0.001 |
| One of the parents has asthma | 1.65 (1.14, 2.39) | 0.007 |

Abbreviations: aOR, adjusted odds ratio; CI, confidence interval; BMI, body mass index; WHtR, waist-to-height ratio.

**Table S2. SNPs of BMI (p-value of meta-analysis< 5×10-8)**

| **SNPs** | **Chr: Position** | **Allele1** | **Allele2** | **p- value of genetic model** | | | **p-value of  meta-analysis** |
| --- | --- | --- | --- | --- | --- | --- | --- |
| **Additive** | **Dominant** | **Recessive** |
| rs11210996 | 1: 44887362 | A | G | 1.36E-04 | 1.41E-02 | 4.78E-05 | 8.37E-09 |
| rs7549310 | 1: 158122966 | T | C | 9.69E-05 | 6.54E-04 | 5.92E-04 | 1.83E-08 |
| rs961562 | 1: 158431666 | C | T | 6.38E-05 | 2.57E-04 | 9.68E-03 | 4.48E-09 |
| Affx-6583783 | 1: 202681729 | C | T | 9.21E-05 | 1.15E-04 | 4.27E-02 | 5.33E-09 |
| rs17012757 | 1: 208714411 | A | G | 2.33E-05 | 2.56E-05 | 2.58E-01 | 1.17E-09 |
| rs78619714 | 1: 208773264 | A | G | 7.80E-05 | 5.35E-04 | 3.99E-03 | 3.12E-09 |
| rs2800930 | 1: 209436177 | A | G | 1.61E-04 | 2.40E-05 | 7.67E-01 | 3.76E-08 |
| rs1498385 | 1: 220114215 | G | A | 1.51E-04 | 1.10E-04 | 5.06E-01 | 4.57E-08 |
| rs12048956 | 1: 225869849 | A | G | 3.11E-05 | 8.86E-06 | 5.25E-01 | 1.10E-09 |
| rs7581129 | 2: 4666664 | C | T | 2.60E-05 | 9.98E-04 | 1.26E-04 | 2.81E-10 |
| rs6713642 | 2: 18282657 | A | G | 1.64E-04 | 2.35E-03 | 1.87E-03 | 1.19E-08 |
| rs12466048 | 2: 30002690 | A | C | 1.08E-04 | 1.05E-04 | 1.63E-02 | 4.46E-09 |
| rs10188389 | 2: 30021598 | T | C | 2.60E-04 | 1.91E-04 | 2.84E-02 | 3.22E-08 |
| rs13413184 | 2: 34135144 | G | A | 2.28E-05 | 7.33E-04 | 4.30E-04 | 1.48E-10 |
| rs12464508 | 2: 126394868 | G | A | 8.29E-05 | 3.31E-03 | 2.32E-04 | 3.39E-09 |
| rs12618696 | 2: 126395158 | A | G | 8.88E-05 | 3.53E-03 | 2.39E-04 | 3.94E-09 |
| rs3980656 | 2: 126401516 | A | C | 1.68E-04 | 8.52E-03 | 1.46E-04 | 1.59E-08 |
| Affx-18912871 | 2: 208693307 | C | T | 3.05E-04 | 8.07E-04 | 1.21E-02 | 4.52E-08 |
| rs12694559 | 2: 221980851 | G | A | 5.00E-05 | 3.21E-05 | 2.48E-02 | 9.25E-10 |
| rs1679252 | 3: 22046939 | G | T | 1.97E-04 | 9.20E-03 | 2.89E-04 | 1.58E-08 |
| rs826217 | 3: 24269789 | C | T | 1.09E-04 | 1.58E-03 | 2.71E-04 | 1.68E-08 |
| rs34464573 | 3: 37442498 | A | - | 2.45E-04 | 2.29E-03 | 3.15E-03 | 4.69E-08 |
| rs10510927 | 3: 64750744 | C | A | 1.11E-04 | 2.10E-04 | 3.59E-02 | 9.99E-09 |
| rs318773 | 3: 64778758 | G | A | 9.26E-05 | 5.20E-04 | 6.27E-03 | 5.69E-09 |
| rs382322 | 3: 64794157 | A | G | 1.83E-04 | 2.60E-04 | 4.70E-02 | 2.47E-08 |
| rs1906064 | 3: 97450010 | A | G | 1.62E-04 | 2.80E-03 | 1.19E-03 | 1.10E-08 |
| rs9820608 | 3: 124075754 | C | T | 2.14E-04 | 1.34E-04 | 7.43E-02 | 2.67E-08 |
| rs62277159 | 3: 156526082 | G | A | 1.56E-04 | 1.70E-03 | 1.83E-04 | 4.53E-08 |
| rs79209862 | 3: 156631388 | C | A | 1.13E-04 | 2.86E-03 | 5.40E-05 | 1.50E-08 |
| rs59899313 | 3: 156635810 | A | G | 1.01E-04 | 2.61E-03 | 5.26E-05 | 1.18E-08 |
| rs2287481 | 3: 169785660 | T | C | 2.93E-04 | 6.73E-04 | 1.67E-02 | 4.81E-08 |
| rs17531088 | 3: 174893775 | C | T | 2.71E-04 | 4.86E-03 | 1.30E-03 | 3.21E-08 |
| rs2035101 | 3: 174895840 | C | T | 2.83E-04 | 7.24E-03 | 8.42E-04 | 3.57E-08 |
| rs2075050 | 4: 13526386 | G | A | 2.38E-04 | 7.18E-03 | 8.52E-04 | 3.02E-08 |
| rs34859220 | 4: 17521797 | A | G | 6.19E-05 | 2.02E-04 | 1.44E-02 | 6.07E-09 |
| rs35546694 | 4: 17543721 | T | C | 1.19E-04 | 7.97E-05 | 2.24E-01 | 1.64E-08 |
| rs2062990 | 4: 33461734 | G | A | 1.07E-04 | 8.32E-04 | 3.27E-03 | 8.88E-09 |
| (Continued on next page) | | | | | | | |
| **SNPs** | **Chr: Position** | **Allele1** | **Allele2** | **p- value of genetic model** | | | **p-value of  meta-analysis** |
| **Additive** | **Dominant** | **Recessive** |
| rs17709654 | 4: 55788140 | G | A | 1.40E-04 | 3.73E-04 | 2.62E-02 | 2.33E-08 |
| rs6534543 | 4: 127245675 | T | G | 5.85E-05 | 8.32E-04 | 2.72E-04 | 4.10E-09 |
| rs4425324 | 4: 145142144 | A | C | 8.69E-05 | 4.70E-04 | 4.38E-03 | 2.96E-09 |
| rs4569733 | 4: 153585984 | T | C | 2.74E-04 | 5.07E-04 | 1.88E-02 | 3.73E-08 |
| rs7677112 | 4: 182237123 | G | A | 2.60E-04 | 3.77E-04 | 2.79E-02 | 3.60E-08 |
| rs250846 | 5: 14116980 | C | T | 2.14E-04 | 1.19E-03 | 6.49E-03 | 2.92E-08 |
| rs7720861 | 5: 81893325 | T | C | 1.13E-04 | 4.20E-04 | 9.37E-03 | 1.32E-08 |
| rs13186402 | 5: 146884365 | T | C | 7.45E-05 | 6.60E-05 | 1.46E-01 | 6.22E-09 |
| rs74676523 | 6: 16720981 | A | C | 3.90E-05 | 2.80E-05 | 3.55E-01 | 2.55E-09 |
| rs12203389 | 6: 21220531 | A | G | 1.82E-04 | 1.32E-04 | 2.61E-02 | 1.52E-08 |
| rs9388658 | 6: 128962761 | T | C | 1.79E-04 | 1.07E-03 | 5.68E-03 | 1.60E-08 |
| rs545102 | 6: 128988094 | C | T | 1.44E-04 | 8.01E-04 | 5.78E-03 | 9.91E-09 |
| rs72971630 | 6: 136115951 | A | G | 2.16E-04 | 8.76E-05 | 3.06E-01 | 4.75E-08 |
| rs9355826 | 6: 158046952 | G | A | 2.93E-04 | 2.58E-03 | 4.19E-03 | 4.57E-08 |
| rs213272 | 7: 18504411 | A | G | 2.44E-04 | 9.46E-04 | 8.13E-03 | 2.75E-08 |
| rs74802098 | 7: 28950561 | C | T | 2.12E-05 | 8.19E-05 | 9.77E-03 | 6.41E-10 |
| rs10954664 | 7: 81775555 | C | T | 1.64E-05 | 2.28E-04 | 8.18E-04 | 7.91E-11 |
| rs851845 | 7: 147210919 | C | T | 2.14E-04 | 1.10E-03 | 5.74E-03 | 2.11E-08 |
| rs7001120 | 8: 25844226 | G | A | 2.94E-04 | 3.76E-03 | 2.71E-03 | 4.41E-08 |
| rs73570753 | 8: 28175255 | T | C | 1.08E-04 | 2.35E-04 | 2.55E-02 | 8.48E-09 |
| Affx-32123528 | 8: 36728094 | T | G | 9.66E-05 | 1.59E-04 | 1.02E-01 | 2.20E-08 |
| rs66527557 | 8: 88008175 | T | G | 9.59E-05 | 2.96E-03 | 1.68E-04 | 5.19E-09 |
| rs67067838 | 8: 88018209 | A | G | 1.78E-04 | 3.21E-03 | 6.01E-04 | 1.98E-08 |
| rs3102478 | 8: 96746039 | G | C | 1.10E-04 | 1.47E-02 | 1.01E-04 | 4.81E-09 |
| rs2565147 | 8: 97778346 | G | C | 1.23E-07 | 1.85E-07 | 1.25E-01 | 3.50E-14 |
| rs3763558 | 8: 97796731 | A | C | 1.27E-07 | 1.91E-07 | 1.24E-01 | 3.73E-14 |
| rs12678667 | 8: 97802582 | A | G | 4.75E-06 | 6.68E-06 | 1.05E-01 | 3.65E-11 |
| rs7837462 | 8: 97840032 | A | G | 2.69E-05 | 2.23E-05 | 3.07E-01 | 1.28E-09 |
| rs2319931 | 8: 97847774 | C | A | 2.85E-05 | 2.15E-05 | 3.06E-01 | 1.30E-09 |
| rs4006531 | 8: 126867505 | A | G | 3.33E-05 | 5.69E-04 | 8.31E-04 | 3.33E-10 |
| rs10491756 | 9: 13559821 | T | G | 1.58E-04 | 1.34E-03 | 1.02E-03 | 3.16E-08 |
| rs3781484 | 10: 21105691 | A | G | 1.22E-05 | 3.85E-05 | 1.47E-02 | 1.90E-10 |
| rs12220495 | 10: 21109906 | T | C | 8.29E-06 | 2.19E-05 | 2.17E-02 | 8.83E-11 |
| rs7946655 | 11: 7437611 | T | C | 2.64E-04 | 3.40E-04 | 2.03E-02 | 3.30E-08 |
| rs11529173 | 11: 20305097 | G | A | 2.95E-04 | 1.71E-04 | 4.54E-02 | 4.07E-08 |
| rs7108795 | 11: 38611186 | T | G | 2.35E-06 | 1.99E-05 | 1.58E-03 | 3.73E-12 |
| rs7122539 | 11: 66662731 | G | A | 2.54E-04 | 1.67E-02 | 3.20E-04 | 2.98E-08 |
| rs6483452 | 11: 95409626 | A | T | 1.32E-04 | 9.64E-05 | 1.71E-01 | 1.82E-08 |
| rs35636563 | 12: 29410853 | T | C | 1.96E-04 | 2.25E-04 | 6.47E-02 | 2.96E-08 |

(Continued on next page)

| **SNPs** | **Chr: Position** | **Allele1** | **Allele2** | **p- value of genetic model** | | | **p-value of  meta-analysis** |
| --- | --- | --- | --- | --- | --- | --- | --- |
| **Additive** | **Dominant** | **Recessive** |
| rs74401896 | 12: 126750468 | A | G | 1.14E-04 | 5.49E-05 | 1.60E-01 | 9.96E-09 |
| rs7323765 | 13: 20807243 | C | G | 1.31E-04 | 5.40E-03 | 3.01E-04 | 7.85E-09 |
| rs927577 | 13: 28063413 | A | G | 2.53E-04 | 5.48E-04 | 1.80E-02 | 3.36E-08 |
| rs9512729 | 13: 28076865 | T | C | 2.47E-04 | 1.36E-03 | 6.87E-03 | 3.28E-08 |
| rs7991712 | 13: 28437325 | T | C | 1.20E-04 | 1.35E-03 | 2.31E-03 | 6.09E-09 |
| rs4943394 | 13: 37154085 | A | G | 8.25E-05 | 1.39E-04 | 3.95E-02 | 5.54E-09 |
| rs2699316 | 13: 103939313 | G | T | 3.07E-06 | 2.62E-06 | 7.84E-03 | 1.71E-12 |
| Affx-8893628 | 13: 105737267 | G | T | 1.46E-04 | 3.69E-04 | 3.67E-02 | 2.81E-08 |
| rs10136204 | 14: 46610740 | G | T | 1.50E-04 | 8.13E-05 | 5.58E-02 | 1.09E-08 |
| rs117777319 | 14: 59363486 | C | T | 9.37E-05 | 3.77E-05 | 3.75E-01 | 9.51E-09 |
| rs11630820 | 15: 25852143 | T | C | 1.37E-04 | 1.49E-03 | 6.63E-04 | 2.40E-08 |
| rs12161931 | 15: 57751124 | G | C | 4.78E-05 | 1.15E-03 | 5.62E-04 | 1.05E-09 |
| rs1567618 | 15: 57759466 | T | C | 5.65E-05 | 1.68E-04 | 1.11E-02 | 1.55E-09 |
| rs6494633 | 15: 67423306 | T | C | 1.20E-04 | 2.99E-03 | 1.09E-06 | 2.49E-08 |
| rs16948292 | 15: 94158240 | G | A | 1.06E-04 | 1.48E-04 | 1.33E-01 | 2.10E-08 |
| rs17544094 | 15: 94158965 | A | G | 4.39E-05 | 4.57E-05 | 1.54E-01 | 2.76E-09 |
| rs72759792 | 15: 94175919 | T | C | 1.33E-04 | 7.80E-05 | 5.01E-01 | 3.01E-08 |
| rs9940100 | 16: 27091802 | G | C | 2.37E-04 | 5.25E-03 | 1.45E-03 | 2.85E-08 |
| rs2285748 | 17: 5295001 | A | G | 2.13E-04 | 1.81E-03 | 4.16E-03 | 2.43E-08 |
| rs2301739 | 17: 5308377 | C | T | 1.66E-04 | 2.39E-03 | 2.04E-03 | 1.40E-08 |
| Affx-14080836 | 17: 5366650 | G | C | 1.19E-04 | 9.00E-04 | 5.06E-03 | 9.37E-09 |
| rs3865351 | 17: 5382031 | T | C | 1.82E-05 | 1.24E-04 | 3.84E-03 | 1.59E-10 |
| rs9910302 | 17: 5394248 | A | G | 1.34E-04 | 3.35E-04 | 2.53E-02 | 1.44E-08 |
| rs72816758 | 17: 10404118 | G | A | 2.54E-04 | 1.17E-03 | 9.05E-03 | 4.49E-08 |
| rs79814358 | 17: 13090334 | A | G | 2.22E-04 | 1.35E-03 | 6.07E-03 | 3.22E-08 |
| Affx-14935219 | 18: 43427623 | A | G | 6.57E-05 | 3.15E-05 | 7.17E-02 | 2.09E-09 |
| rs2282614 | 18: 43429966 | C | T | 1.11E-05 | 1.28E-05 | 1.19E-02 | 3.43E-11 |
| rs570975 | 18: 43430139 | A | G | 5.25E-05 | 2.96E-05 | 6.39E-02 | 1.36E-09 |
| rs12455488 | 18: 43434921 | C | T | 1.21E-04 | 7.72E-05 | 6.83E-02 | 8.15E-09 |
| rs55872303 | 18: 43441400 | T | A | 1.46E-05 | 4.59E-05 | 5.30E-03 | 6.44E-11 |
| rs8099496 | 18: 43445816 | C | G | 1.79E-04 | 1.04E-04 | 7.87E-02 | 1.84E-08 |
| rs11082493 | 18: 43457656 | C | T | 1.28E-04 | 3.49E-05 | 1.52E-01 | 9.51E-09 |
| rs12983584 | 19: 17642864 | T | C | 2.30E-05 | 4.94E-03 | 4.06E-05 | 1.49E-10 |
| rs4808998 | 19: 19939387 | A | G | 1.32E-04 | 1.48E-04 | 9.77E-02 | 1.80E-08 |
| rs12984317 | 19: 31993783 | G | A | 2.09E-04 | 5.11E-04 | 2.84E-02 | 4.81E-08 |
| rs34783010 | 19: 46180414 | T | G | 7.84E-05 | 4.93E-05 | 1.23E-01 | 4.66E-09 |
| rs10423928 | 19: 46182304 | A | T | 6.72E-05 | 4.21E-05 | 1.21E-01 | 3.41E-09 |
| Affx-16231985 | 19: 58899056 | T | C | 2.30E-04 | 2.06E-03 | 3.55E-03 | 2.49E-08 |
| rs6108463 | 20: 10280505 | C | T | 9.24E-06 | 1.88E-04 | 1.45E-04 | 8.76E-11 |

(Continued on next page)

| **SNPs** | **Chr: Position** | **Allele1** | **Allele2** | **p- value of genetic model** | | | **p-value of  meta-analysis** |
| --- | --- | --- | --- | --- | --- | --- | --- |
| **Additive** | **Dominant** | **Recessive** |
| rs5994253 | 22: 17793012 | A | G | 1.47E-04 | 2.26E-03 | 6.39E-04 | 1.90E-08 |
| rs4819450 | 22: 17879078 | T | C | 6.84E-05 | 1.30E-03 | 6.97E-05 | 6.41E-09 |
| Affx-19042757 | 22: 17912139 | G | C | 1.25E-04 | 6.20E-04 | 6.51E-03 | 9.48E-09 |
| rs5769817 | 22: 49426434 | C | T | 1.87E-04 | 7.68E-06 | 3.92E-01 | 1.75E-08 |

**Table S3. SNPs of WHtR (p-value of meta-analysis< 5×10-8)**

| **SNPs** | **Chr: Position** | **Allele1** | **Allele2** | **p- value of genetic model** | | | **p-value of  meta-analysis** |
| --- | --- | --- | --- | --- | --- | --- | --- |
| **Additive** | **Dominant** | **Recessive** |
| rs2365498 | 1: 62312654 | G | A | 1.17E-04 | 7.93E-04 | 3.63E-03 | 5.45E-09 |
| rs7540030 | 1: 63249975 | A | G | 2.78E-04 | 3.05E-03 | 2.05E-03 | 4.94E-08 |
| rs471093 | 1: 67242571 | A | G | 1.92E-04 | 1.96E-04 | 3.47E-02 | 1.82E-08 |
| rs4839387 | 1: 110968264 | G | T | 5.62E-05 | 4.73E-04 | 1.85E-03 | 1.03E-09 |
| rs11102109 | 1: 110990929 | A | C | 3.10E-04 | 5.77E-03 | 1.55E-03 | 4.69E-08 |
| rs1289726 | 1: 164412847 | T | G | 2.98E-04 | 2.12E-04 | 3.87E-02 | 4.64E-08 |
| rs12755303 | 1: 181528555 | G | A | 2.17E-04 | 4.82E-05 | 7.23E-02 | 2.05E-08 |
| rs6684803 | 1: 227513724 | G | A | 2.20E-04 | 1.41E-03 | 4.46E-03 | 3.05E-08 |
| rs2953650 | 1: 227540456 | A | G | 1.46E-04 | 3.59E-04 | 1.82E-02 | 1.42E-08 |
| rs28458951 | 1: 235145946 | C | T | 1.70E-04 | 5.61E-06 | 6.07E-01 | 1.62E-08 |
| rs16860836 | 2: 13954007 | C | T | 1.79E-05 | 4.63E-05 | 1.54E-02 | 1.94E-10 |
| rs13413184 | 2: 34135144 | G | A | 2.17E-04 | 1.48E-03 | 4.81E-03 | 2.27E-08 |
| rs11406323 | 2: 40782411 | T | - | 2.87E-04 | 2.98E-02 | 1.70E-04 | 3.88E-08 |
| rs1568532 | 2: 159097942 | G | T | 9.13E-05 | 1.18E-03 | 9.20E-05 | 1.54E-08 |
| rs4673304 | 2: 205434906 | T | C | 9.71E-05 | 8.15E-05 | 9.55E-02 | 7.47E-09 |
| rs11711765 | 3: 16243596 | G | A | 3.13E-04 | 1.37E-03 | 8.02E-03 | 4.87E-08 |
| rs116945425 | 3: 19168569 | C | T | 8.68E-05 | 3.69E-04 | 8.38E-03 | 1.27E-08 |
| rs6445725 | 3: 55263626 | G | A | 2.05E-04 | 4.04E-04 | 3.65E-02 | 3.66E-08 |
| rs1906064 | 3: 97450010 | A | G | 2.95E-04 | 1.47E-02 | 2.54E-04 | 4.15E-08 |
| rs11711827 | 3: 196317973 | T | C | 9.54E-05 | 3.54E-04 | 6.10E-03 | 3.47E-09 |
| rs2062990 | 4: 33461734 | G | A | 1.13E-04 | 3.49E-03 | 1.35E-04 | 9.71E-09 |
| rs73809009 | 4: 40400453 | T | C | 8.29E-05 | 3.00E-04 | 1.35E-02 | 7.12E-09 |
| rs17586736 | 4: 40400621 | T | A | 7.60E-05 | 2.69E-04 | 1.42E-02 | 6.04E-09 |
| rs17084662 | 4: 65200217 | A | G | 2.27E-04 | 1.46E-03 | 5.30E-03 | 3.07E-08 |
| rs17253722 | 4: 77367287 | A | G | 3.66E-05 | 1.24E-04 | 1.54E-02 | 1.69E-09 |
| rs6848127 | 4: 85858329 | T | C | 2.49E-04 | 2.45E-04 | 4.70E-02 | 3.57E-08 |
| rs6533014 | 4: 103349740 | G | A | 1.26E-04 | 1.48E-03 | 2.06E-03 | 6.44E-09 |
| rs6534543 | 4: 127245675 | T | G | 7.09E-05 | 1.07E-03 | 2.15E-04 | 6.13E-09 |
| rs4425324 | 4: 145142144 | A | C | 5.47E-05 | 2.09E-04 | 5.41E-03 | 1.05E-09 |
| rs4696124 | 4: 152935555 | G | T | 8.39E-05 | 2.83E-05 | 9.06E-01 | 1.21E-08 |
| rs11735097 | 4: 174559666 | G | T | 1.06E-04 | 5.12E-05 | 7.89E-02 | 6.00E-09 |
| rs4695868 | 4: 174570113 | C | T | 2.03E-05 | 5.44E-05 | 9.15E-03 | 1.63E-10 |
| rs26956 | 5: 59790985 | A | C | 1.06E-04 | 1.70E-03 | 1.33E-03 | 4.54E-09 |
| rs35387 | 5: 59802669 | G | C | 2.13E-04 | 3.29E-03 | 1.67E-03 | 1.99E-08 |
| rs12153582 | 5: 89008780 | C | T | 9.01E-05 | 4.76E-04 | 6.36E-03 | 8.48E-09 |
| rs12519946 | 5: 167665598 | C | G | 2.85E-04 | 4.47E-05 | 1.06E-01 | 3.88E-08 |
| rs13177353 | 5: 173424817 | A | G | 1.55E-04 | 1.96E-03 | 1.72E-03 | 1.22E-08 |
| (Continued on next page) | | | | | | | |
| **SNPs** | **Chr: Position** | **Allele1** | **Allele2** | **p- value of genetic model** | | | **p-value of  meta-analysis** |
| **Additive** | **Dominant** | **Recessive** |
| rs73353387 | 6: 4151489 | T | C | 6.01E-05 | 3.01E-05 | 9.18E-02 | 1.98E-09 |
| rs4605929 | 6: 4151518 | A | G | 1.15E-04 | 2.12E-04 | 2.22E-02 | 7.14E-09 |
| rs74676523 | 6: 16720981 | A | C | 1.10E-05 | 2.19E-05 | 5.16E-02 | 1.93E-10 |
| rs2151317 | 6: 64468738 | C | T | 1.51E-04 | 1.47E-04 | 3.21E-01 | 4.66E-08 |
| rs117583806 | 6: 86937543 | T | G | 1.37E-04 | 7.20E-05 | 5.42E-01 | 3.14E-08 |
| rs9388658 | 6: 128962761 | T | C | 1.65E-04 | 3.05E-03 | 1.37E-03 | 1.34E-08 |
| rs545102 | 6: 128988094 | C | T | 1.01E-04 | 2.11E-03 | 1.03E-03 | 4.50E-09 |
| rs433395 | 7: 23401955 | T | G | 2.18E-04 | 5.81E-04 | 2.34E-02 | 4.17E-08 |
| rs74802098 | 7: 28950561 | C | T | 5.47E-05 | 2.37E-04 | 7.27E-03 | 4.54E-09 |
| rs11238340 | 7: 55020736 | T | C | 2.14E-04 | 6.52E-04 | 1.50E-02 | 2.78E-08 |
| rs139159024 | 8: 3312598 | G | T | 1.03E-04 | 5.18E-04 | 6.35E-03 | 9.04E-09 |
| rs7008421 | 8: 3315792 | T | C | 1.40E-04 | 2.38E-04 | 3.83E-02 | 1.56E-08 |
| rs2725716 | 8: 5435862 | T | G | 1.77E-04 | 4.12E-04 | 3.02E-02 | 3.36E-08 |
| rs6998654 | 8: 22227522 | T | C | 1.25E-04 | 1.07E-03 | 2.02E-03 | 1.35E-08 |
| rs7431 | 8: 22398462 | G | A | 1.68E-04 | 5.78E-04 | 9.36E-03 | 1.36E-08 |
| rs4873644 | 8: 53379300 | C | T | 7.95E-05 | 5.82E-05 | 4.79E-02 | 3.07E-09 |
| rs903027 | 8: 62409428 | G | T | 1.16E-04 | 2.86E-04 | 1.12E-02 | 5.70E-09 |
| rs66527557 | 8: 88008175 | T | G | 1.66E-04 | 5.92E-03 | 1.15E-04 | 1.72E-08 |
| rs67067838 | 8: 88018209 | A | G | 2.35E-04 | 5.99E-03 | 2.75E-04 | 3.59E-08 |
| rs3102478 | 8: 96746039 | G | C | 1.72E-04 | 1.82E-02 | 1.53E-04 | 1.31E-08 |
| rs1975282 | 8: 96909657 | A | C | 1.53E-04 | 2.22E-04 | 2.74E-02 | 1.22E-08 |
| rs2565147 | 8: 97778346 | G | C | 2.00E-06 | 4.10E-06 | 5.01E-02 | 1.00E-11 |
| rs3763558 | 8: 97796731 | A | C | 1.11E-06 | 2.30E-06 | 4.98E-02 | 3.08E-12 |
| rs12678667 | 8: 97802582 | A | G | 1.16E-05 | 2.55E-05 | 4.41E-02 | 2.31E-10 |
| rs7837462 | 8: 97840032 | A | G | 2.58E-05 | 3.77E-05 | 1.14E-01 | 1.20E-09 |
| rs2319931 | 8: 97847774 | C | A | 2.66E-05 | 4.12E-05 | 9.15E-02 | 1.15E-09 |
| rs800574 | 8: 116717451 | A | C | 2.58E-04 | 9.36E-04 | 1.53E-02 | 4.72E-08 |
| rs800535 | 8: 116720390 | T | G | 9.87E-05 | 6.82E-05 | 4.13E-02 | 4.71E-09 |
| rs4006531 | 8: 126867505 | A | G | 1.64E-04 | 1.10E-03 | 4.13E-03 | 1.18E-08 |
| rs4416856 | 8: 138694431 | T | C | 8.17E-06 | 3.57E-05 | 4.14E-03 | 2.70E-11 |
| rs4495466 | 8: 138705476 | G | A | 5.82E-06 | 2.47E-05 | 5.70E-03 | 2.11E-11 |
| rs4631498 | 8: 138750268 | A | G | 1.01E-04 | 2.72E-04 | 2.29E-02 | 1.04E-08 |
| rs3897732 | 8: 139175625 | T | C | 2.66E-04 | 1.72E-03 | 4.75E-03 | 3.32E-08 |
| rs10812220 | 9: 25311297 | C | T | 2.21E-04 | 6.48E-04 | 1.11E-02 | 2.29E-08 |
| rs7038072 | 9: 25326440 | C | T | 2.08E-04 | 5.24E-04 | 1.32E-02 | 2.03E-08 |
| rs11791402 | 9: 25340212 | T | C | 1.20E-04 | 1.46E-04 | 2.60E-02 | 6.54E-09 |
| rs10966868 | 9: 25342777 | G | C | 3.03E-05 | 3.68E-05 | 1.59E-02 | 3.01E-10 |
| rs9942969 | 9: 25689989 | G | A | 9.83E-06 | 4.67E-06 | 4.10E-02 | 3.32E-11 |
| rs4461986 | 9: 25690311 | A | C | 3.19E-05 | 2.70E-02 | 3.97E-06 | 2.99E-10 |
| (Continued on next page) | | | | | | | |

| **SNPs** | **Chr: Position** | **Allele1** | **Allele2** | **p- value of genetic model** | | | **p-value of  meta-analysis** |
| --- | --- | --- | --- | --- | --- | --- | --- |
| **Additive** | **Dominant** | **Recessive** |
| rs7019362 | 9: 89669656 | T | G | 2.58E-04 | 8.57E-03 | 7.40E-04 | 3.15E-08 |
| Affx-34367482 | 9: 93386423 | C | T | 2.18E-04 | 1.51E-03 | 4.39E-03 | 2.33E-08 |
| rs10985402 | 9: 124578782 | T | G | 1.29E-04 | 3.84E-03 | 5.51E-04 | 7.27E-09 |
| rs7047145 | 9: 124822176 | T | C | 8.65E-05 | 1.04E-04 | 9.50E-02 | 9.02E-09 |
| rs11251441 | 10: 2750208 | C | T | 1.97E-04 | 6.67E-03 | 4.65E-04 | 1.89E-08 |
| rs11251448 | 10: 2757555 | T | G | 2.14E-04 | 2.23E-04 | 1.07E-01 | 4.68E-08 |
| rs7905174 | 10: 14908241 | T | A | 1.42E-04 | 1.29E-04 | 2.87E-02 | 8.98E-09 |
| rs12220495 | 10: 21109906 | T | C | 1.05E-04 | 2.92E-04 | 2.36E-02 | 1.72E-08 |
| rs596642 | 10: 35936753 | T | C | 9.68E-05 | 1.34E-03 | 1.48E-03 | 3.30E-09 |
| rs3750779 | 10: 71712502 | T | C | 3.11E-05 | 2.26E-04 | 2.47E-03 | 9.41E-10 |
| rs7918637 | 10: 107942299 | T | C | 1.56E-04 | 2.79E-04 | 5.45E-02 | 2.92E-08 |
| rs11016162 | 10: 130093238 | T | C | 3.55E-05 | 7.56E-05 | 1.49E-02 | 3.96E-09 |
| rs10833295 | 11: 20348963 | T | C | 1.45E-04 | 6.06E-04 | 9.89E-03 | 2.34E-08 |
| rs1000677 | 11: 33814061 | G | A | 2.59E-04 | 1.32E-03 | 8.41E-03 | 4.09E-08 |
| rs7108795 | 11: 38611186 | T | G | 1.14E-06 | 1.57E-05 | 5.23E-04 | 8.07E-13 |
| rs7944359 | 11: 42346370 | T | C | 9.50E-05 | 4.17E-03 | 1.12E-04 | 4.50E-09 |
| rs16936559 | 11: 42379607 | A | C | 6.96E-05 | 6.49E-05 | 3.15E-01 | 9.66E-09 |
| rs78494560 | 11: 76764655 | A | G | 3.72E-05 | 1.87E-04 | 5.91E-03 | 1.20E-09 |
| rs6489544 | 12: 583542 | A | G | 1.06E-04 | 1.19E-04 | 4.37E-01 | 3.49E-08 |
| rs10744055 | 12: 14459357 | A | C | 2.58E-04 | 1.91E-02 | 1.60E-04 | 2.86E-08 |
| rs35636563 | 12: 29410853 | T | C | 1.81E-05 | 1.55E-05 | 4.81E-02 | 1.70E-10 |
| rs12314737 | 12: 29446844 | G | A | 6.47E-05 | 3.69E-05 | 7.74E-02 | 2.33E-09 |
| rs1150982 | 12: 32060340 | C | G | 1.90E-04 | 3.49E-04 | 5.82E-02 | 4.51E-08 |
| rs12296235 | 12: 33834543 | C | A | 1.04E-04 | 1.27E-04 | 1.49E-01 | 1.79E-08 |
| rs10506115 | 12: 33845977 | G | A | 3.81E-05 | 8.18E-04 | 1.26E-04 | 1.57E-09 |
| rs1550565 | 12: 68968865 | G | A | 3.20E-04 | 1.13E-03 | 9.17E-03 | 4.82E-08 |
| rs10745657 | 12: 93973501 | G | A | 1.97E-04 | 1.41E-02 | 1.40E-05 | 2.50E-08 |
| rs60850144 | 13: 26513782 | G | A | 7.31E-05 | 4.59E-04 | 3.95E-03 | 3.52E-09 |
| rs7323933 | 13: 26520697 | T | C | 1.55E-04 | 3.53E-04 | 2.97E-02 | 2.19E-08 |
| rs1980744 | 13: 26525954 | C | A | 7.45E-05 | 4.71E-04 | 3.94E-03 | 3.60E-09 |
| rs2699316 | 13: 103939313 | G | T | 1.02E-05 | 5.32E-05 | 2.45E-03 | 2.62E-11 |
| rs1449104 | 14: 84937257 | G | A | 1.53E-05 | 2.63E-06 | 5.79E-02 | 6.66E-11 |
| rs12161931 | 15: 57751124 | G | C | 2.10E-04 | 4.28E-03 | 9.10E-04 | 2.68E-08 |
| rs1567618 | 15: 57759466 | T | C | 1.63E-04 | 4.97E-04 | 1.45E-02 | 1.58E-08 |
| rs351230 | 15: 74482997 | A | G | 1.42E-04 | 7.66E-03 | 1.43E-04 | 9.60E-09 |
| rs16948292 | 15: 94158240 | G | A | 1.15E-04 | 1.23E-04 | 2.26E-01 | 2.45E-08 |
| rs11649344 | 16: 7946980 | T | C | 1.59E-04 | 2.68E-04 | 4.45E-02 | 2.23E-08 |
| rs1878092 | 16: 27124486 | C | T | 1.41E-04 | 4.59E-03 | 4.84E-04 | 8.71E-09 |
| rs2161627 | 16: 66065992 | C | T | 8.65E-05 | 1.25E-04 | 2.28E-02 | 3.59E-09 |
| (Continued on next page) | | | | | | | |
| **SNPs** | **Chr: Position** | **Allele1** | **Allele2** | **p- value of genetic model** | | | **p-value of  meta-analysis** |
| **Additive** | **Dominant** | **Recessive** |
| rs9926661 | 16: 66066808 | G | T | 4.36E-05 | 4.55E-05 | 2.37E-02 | 7.74E-10 |
| rs3865351 | 17: 5382031 | T | C | 6.27E-05 | 1.29E-03 | 8.93E-04 | 2.34E-09 |
| rs9910302 | 17: 5394248 | A | G | 1.72E-04 | 5.21E-04 | 2.03E-02 | 2.47E-08 |
| rs72816758 | 17: 10404118 | G | A | 1.36E-04 | 6.31E-04 | 7.76E-03 | 1.16E-08 |
| rs12326088 | 18: 73507569 | T | G | 1.65E-05 | 1.85E-06 | 2.51E-01 | 1.32E-10 |
| rs17055051 | 18: 73508591 | A | G | 3.07E-05 | 2.90E-06 | 3.14E-01 | 5.00E-10 |
| rs78805127 | 18: 74269405 | T | G | 9.99E-05 | 1.00E-04 | 3.86E-01 | 2.39E-08 |
| rs75080842 | 18: 74270848 | C | T | 7.75E-05 | 8.17E-05 | 3.81E-01 | 1.54E-08 |
| rs12983584 | 19: 17642864 | T | C | 2.24E-04 | 1.43E-02 | 3.42E-04 | 2.36E-08 |
| rs34783010 | 19: 46180414 | T | G | 1.03E-04 | 3.92E-05 | 2.12E-01 | 8.18E-09 |
| rs10423928 | 19: 46182304 | A | T | 8.62E-05 | 3.31E-05 | 2.08E-01 | 5.79E-09 |
| rs6037988 | 20: 4830412 | C | T | 1.96E-04 | 3.42E-04 | 1.64E-02 | 1.85E-08 |
| rs815998 | 20: 12980668 | C | T | 1.52E-04 | 9.96E-04 | 4.41E-03 | 1.49E-08 |
| rs2866705 | 20: 40330362 | T | C | 5.46E-05 | 2.35E-03 | 1.28E-04 | 1.47E-09 |
| rs4812541 | 20: 40342897 | C | T | 5.06E-05 | 8.87E-05 | 1.33E-02 | 9.46E-10 |
| rs6029785 | 20: 40343341 | C | T | 2.95E-05 | 1.29E-03 | 1.14E-04 | 3.69E-10 |
| rs4591400 | 20: 48782534 | A | G | 2.11E-04 | 4.05E-03 | 4.09E-04 | 3.58E-08 |
| rs6020323 | 20: 48785923 | G | A | 1.86E-04 | 3.63E-03 | 3.93E-04 | 2.71E-08 |
| rs2259403 | 21: 14693381 | A | G | 1.32E-04 | 7.00E-03 | 2.89E-04 | 7.92E-09 |
| rs885867 | 22: 38811282 | T | C | 2.26E-04 | 1.87E-04 | 3.56E-02 | 2.41E-08 |
|  | | | | | | | |

**Table S4. SNPs of asthma (p-value of meta-analysis< 5×10-8)**

| **SNPs** | **Chr: Position** | **Allele1** | **Allele2** | **p- value of genetic model** | | | **p-value of  meta-analysis** |
| --- | --- | --- | --- | --- | --- | --- | --- |
| **Additive** | **Dominant** | **Recessive** |
| rs11210858 | 1: 43978837 | T | C | 6.38E-05 | 1.35E-05 | 1.35E-05 | 1.41E-09 |
| Affx-12675072 | 1: 63480641 | T | A | 2.55E-05 | 9.48E-05 | 9.48E-05 | 1.83E-10 |
| rs12566149 | 1: 63483556 | T | G | 5.35E-05 | 9.08E-05 | 9.08E-05 | 9.29E-10 |
| rs4436421 | 1: 63490520 | T | C | 3.88E-05 | 4.08E-05 | 4.08E-05 | 4.40E-10 |
| rs1883998 | 1: 171418955 | A | G | 2.41E-04 | 1.44E-04 | 1.44E-04 | 2.84E-08 |
| rs1890865 | 1: 207152756 | G | A | 4.99E-05 | 3.09E-04 | 3.09E-04 | 2.76E-09 |
| rs12066864 | 1: 239301959 | G | T | 2.11E-04 | 2.84E-04 | 2.84E-04 | 3.83E-08 |
| rs4672323 | 2: 60083300 | C | T | 1.47E-04 | 1.78E-03 | 1.78E-03 | 9.83E-09 |
| rs7562274 | 2: 60083748 | C | T | 1.35E-04 | 1.50E-03 | 1.50E-03 | 8.40E-09 |
| rs7600300 | 2: 60086515 | G | A | 9.13E-05 | 7.21E-04 | 7.21E-04 | 3.62E-09 |
| rs763297 | 2: 60097447 | C | T | 6.91E-05 | 1.47E-02 | 1.47E-02 | 1.58E-09 |
| rs34399660 | 2: 60283233 | A | G | 1.75E-04 | 1.89E-03 | 1.89E-03 | 1.86E-08 |
| rs60432528 | 2: 60283349 | T | A | 1.46E-04 | 1.50E-03 | 1.50E-03 | 1.23E-08 |
| rs10520228 | 2: 79236614 | G | A | 4.83E-05 | 1.93E-05 | 1.93E-05 | 2.68E-09 |
| rs442513 | 2: 79240834 | A | G | 2.61E-05 | 4.56E-06 | 4.56E-06 | 4.68E-10 |
| rs437587 | 2: 79272737 | T | C | 1.95E-05 | 7.14E-06 | 7.14E-06 | 2.59E-10 |
| rs11691046 | 2: 79277754 | T | C | 9.72E-05 | 7.93E-05 | 7.93E-05 | 1.15E-08 |
| rs62174389 | 2: 169535153 | T | G | 1.28E-04 | 4.34E-05 | 4.34E-05 | 3.06E-08 |
| rs4663568 | 2: 236207394 | G | C | 2.30E-04 | 8.94E-05 | 8.94E-05 | 4.79E-08 |
| rs971930 | 3: 10872262 | T | G | 1.58E-04 | 1.61E-04 | 1.61E-04 | 3.19E-08 |
| rs3821762 | 3: 10948477 | T | G | 7.07E-05 | 5.59E-05 | 5.59E-05 | 4.48E-09 |
| rs4688261 | 3: 61620775 | A | G | 8.68E-05 | 7.29E-03 | 7.29E-03 | 2.67E-09 |
| rs9866355 | 3: 116426586 | T | C | 1.86E-04 | 8.88E-03 | 8.88E-03 | 1.91E-08 |
| rs2948814 | 3: 124804204 | A | C | 1.18E-04 | 7.25E-04 | 7.25E-04 | 5.61E-09 |
| rs6448518 | 4: 27390449 | G | A | 3.08E-05 | 2.12E-04 | 2.12E-04 | 8.08E-10 |
| rs210774 | 4: 27428596 | C | A | 5.33E-07 | 1.49E-06 | 1.49E-06 | 1.89E-13 |
| rs210782 | 4: 27450750 | C | A | 4.77E-06 | 4.58E-06 | 4.58E-06 | 2.02E-11 |
| rs981710 | 4: 27658939 | C | T | 1.85E-04 | 1.48E-04 | 1.48E-04 | 1.82E-08 |
| rs12641222 | 4: 38154707 | T | C | 3.38E-05 | 6.74E-05 | 6.74E-05 | 9.80E-10 |
| rs1397809 | 4: 60329832 | G | A | 8.93E-05 | 1.74E-04 | 1.74E-04 | 1.10E-08 |
| rs17290730 | 4: 60356844 | G | C | 1.25E-04 | 3.94E-04 | 3.94E-04 | 2.60E-08 |
| rs9993339 | 4: 60368014 | T | G | 1.13E-04 | 2.17E-04 | 2.17E-04 | 1.90E-08 |
| rs11946397 | 4: 99415304 | T | G | 6.13E-05 | 1.22E-04 | 1.22E-04 | 2.27E-09 |
| rs4073209 | 4: 140704956 | G | C | 2.71E-04 | 3.68E-04 | 3.68E-04 | 3.70E-08 |
| rs58327553 | 4: 153256439 | T | C | 1.59E-04 | 9.16E-05 | 9.16E-05 | 2.97E-08 |
| rs117949645 | 4: 178901907 | C | T | 1.04E-04 | 5.42E-05 | 5.42E-05 | 1.70E-08 |
| rs1462512 | 4: 178908886 | C | G | 1.32E-04 | 1.27E-04 | 1.27E-04 | 2.00E-08 |
| (Continued on next page) | | | | | | | |
| **SNPs** | **Chr: Position** | **Allele1** | **Allele2** | **p- value of genetic model** | | | **p-value of  meta-analysis** |
| **Additive** | **Dominant** | **Recessive** |
| rs17065494 | 4: 178911822 | C | T | 1.10E-04 | 1.02E-04 | 1.02E-04 | 1.43E-08 |
| rs1676177 | 4: 178967175 | A | G | 1.08E-04 | 7.10E-05 | 7.10E-05 | 1.42E-08 |
| rs1381698 | 4: 178979494 | T | C | 1.19E-04 | 5.70E-04 | 5.70E-04 | 1.12E-08 |
| rs2085707 | 5: 100631056 | T | C | 9.64E-05 | 2.33E-05 | 2.33E-05 | 6.67E-09 |
| rs7714922 | 5: 100635105 | G | A | 1.25E-04 | 2.74E-05 | 2.74E-05 | 1.12E-08 |
| rs7734086 | 5: 146855963 | C | T | 2.53E-04 | 2.10E-03 | 2.10E-03 | 3.99E-08 |
| rs958677 | 5: 146862229 | C | A | 8.33E-05 | 1.32E-03 | 1.32E-03 | 3.38E-09 |
| rs10065435 | 5: 148684169 | C | G | 1.35E-04 | 1.14E-03 | 1.14E-03 | 1.24E-08 |
| rs6910196 | 6: 18102507 | A | C | 1.73E-04 | 5.86E-04 | 5.86E-04 | 3.41E-08 |
| rs6910353 | 6: 18102558 | A | C | 2.25E-05 | 1.12E-03 | 1.12E-03 | 1.37E-10 |
| rs12189658 | 6: 18103337 | A | T | 2.44E-05 | 3.65E-03 | 3.65E-03 | 1.61E-10 |
| rs9477622 | 6: 18103661 | G | A | 6.39E-06 | 5.52E-04 | 5.52E-04 | 8.47E-12 |
| rs6899431 | 6: 18110443 | C | T | 9.13E-05 | 5.11E-03 | 5.11E-03 | 2.93E-09 |
| rs7767175 | 6: 46805403 | C | A | 1.99E-04 | 4.31E-03 | 4.31E-03 | 1.76E-08 |
| rs220688 | 6: 46814311 | C | A | 2.99E-04 | 5.85E-03 | 5.85E-03 | 4.41E-08 |
| rs13211684 | 6: 51175486 | C | T | 2.10E-04 | 1.27E-03 | 1.27E-03 | 3.80E-08 |
| rs1327259 | 6: 51177811 | A | G | 1.43E-04 | 2.66E-04 | 2.66E-04 | 1.49E-08 |
| rs9342841 | 6: 72251860 | T | C | 1.43E-04 | 1.27E-03 | 1.27E-03 | 9.20E-09 |
| rs9494139 | 6: 135414793 | G | A | 1.66E-04 | 1.56E-03 | 1.56E-03 | 1.79E-08 |
| rs7753012 | 6: 142745883 | T | G | 2.05E-04 | 6.23E-04 | 6.23E-04 | 3.68E-08 |
| rs13195550 | 6: 143159284 | T | C | 1.92E-04 | 5.97E-03 | 5.97E-03 | 2.18E-08 |
| rs9376710 | 6: 143193404 | A | G | 1.56E-04 | 8.44E-03 | 8.44E-03 | 1.05E-08 |
| rs1514334 | 6: 163306080 | G | A | 1.84E-04 | 2.12E-03 | 2.12E-03 | 1.47E-08 |
| rs9347189 | 6: 167660562 | A | G | 1.24E-04 | 4.82E-04 | 4.82E-04 | 7.34E-09 |
| rs397728 | 6: 167683846 | T | G | 8.14E-05 | 1.82E-04 | 1.82E-04 | 2.83E-09 |
| rs2076005 | 6: 167704944 | T | G | 1.96E-04 | 1.60E-04 | 1.60E-04 | 1.94E-08 |
| rs6959056 | 7: 15721466 | A | G | 1.34E-04 | 1.54E-03 | 1.54E-03 | 7.72E-09 |
| rs1156212 | 7: 15729606 | C | T | 1.63E-04 | 5.46E-04 | 5.46E-04 | 1.47E-08 |
| rs72612644 | 7: 82518297 | A | G | 1.40E-04 | 1.86E-03 | 1.86E-03 | 1.09E-08 |
| rs3800570 | 7: 138411332 | G | C | 9.47E-05 | 1.04E-04 | 1.04E-04 | 9.68E-09 |
| rs3807147 | 7: 138440260 | T | C | 7.79E-05 | 9.65E-05 | 9.65E-05 | 1.25E-08 |
| rs11770897 | 7: 138440932 | G | C | 9.13E-05 | 1.05E-04 | 1.05E-04 | 1.68E-08 |
| rs12114153 | 8: 1240368 | G | A | 2.95E-04 | 1.04E-02 | 1.04E-02 | 4.51E-08 |
| rs481958 | 8: 9868814 | T | G | 2.41E-04 | 5.58E-03 | 5.58E-03 | 2.62E-08 |
| rs1962448 | 8: 9871971 | G | A | 1.86E-04 | 1.15E-02 | 1.15E-02 | 1.46E-08 |
| rs10098030 | 8: 69013865 | A | G | 2.20E-04 | 2.70E-04 | 2.70E-04 | 2.55E-08 |
| rs6472383 | 8: 69019228 | C | T | 1.58E-04 | 2.99E-04 | 2.99E-04 | 1.14E-08 |
| rs2446930 | 8: 101085056 | C | T | 9.82E-05 | 1.99E-03 | 1.99E-03 | 3.73E-09 |
| rs1380994 | 8: 101085778 | G | A | 1.04E-04 | 2.05E-03 | 2.05E-03 | 4.46E-09 |
| (Continued on next page) | | | | | | | |
| **SNPs** | **Chr: Position** | **Allele1** | **Allele2** | **p- value of genetic model** | | | **p-value of  meta-analysis** |
| **Additive** | **Dominant** | **Recessive** |
| rs11779405 | 8: 104107840 | G | A | 1.86E-04 | 1.60E-03 | 1.60E-03 | 2.70E-08 |
| rs12765968 | 10: 5331445 | G | T | 1.58E-04 | 2.22E-04 | 2.22E-04 | 1.77E-08 |
| rs7081029 | 10: 5333043 | T | C | 1.01E-04 | 6.39E-04 | 6.39E-04 | 6.18E-09 |
| rs10900242 | 10: 43007849 | T | C | 1.03E-04 | 6.35E-04 | 6.35E-04 | 9.96E-09 |
| rs7102136 | 11: 116005364 | C | T | 7.78E-05 | 3.22E-04 | 3.22E-04 | 5.80E-09 |
| rs17673113 | 11: 123405152 | G | A | 1.34E-04 | 1.60E-03 | 1.60E-03 | 1.27E-08 |
| rs4936824 | 11: 123408945 | C | T | 7.97E-05 | 6.68E-04 | 6.68E-04 | 4.34E-09 |
| rs2240766 | 12: 4677255 | C | T | 2.23E-04 | 9.77E-04 | 9.77E-04 | 4.07E-08 |
| rs9528692 | 13: 34739132 | G | A | 2.26E-05 | 2.65E-05 | 2.65E-05 | 6.44E-10 |
| rs9318244 | 13: 74655739 | G | A | 9.72E-05 | 9.51E-05 | 9.51E-05 | 1.01E-08 |
| rs7991812 | 13: 93226278 | C | T | 8.90E-05 | 3.31E-04 | 3.31E-04 | 5.59E-09 |
| rs11626467 | 14: 24129574 | A | G | 2.19E-04 | 8.59E-04 | 8.59E-04 | 2.84E-08 |
| rs58123776 | 14: 24308557 | G | A | 2.62E-04 | 8.55E-04 | 8.55E-04 | 4.45E-08 |
| rs8013989 | 14: 34200023 | A | G | 1.63E-05 | 1.71E-05 | 1.71E-05 | 1.24E-10 |
| rs56247013 | 14: 34490190 | A | C | 1.58E-04 | 1.12E-03 | 1.12E-03 | 2.75E-08 |
| rs55912139 | 14: 34490349 | G | A | 1.24E-04 | 9.97E-04 | 9.97E-04 | 1.62E-08 |
| rs11624981 | 14: 34490752 | G | A | 1.18E-04 | 2.38E-03 | 2.38E-03 | 8.79E-09 |
| rs74870883 | 14: 38659367 | T | C | 8.19E-05 | 4.87E-05 | 4.87E-05 | 5.19E-09 |
| rs10143946 | 14: 39040391 | G | T | 2.32E-04 | 1.36E-03 | 1.36E-03 | 3.28E-08 |
| rs62012022 | 14: 48581396 | A | G | 2.53E-04 | 2.59E-03 | 2.59E-03 | 4.82E-08 |
| rs17103145 | 14: 75801604 | G | A | 1.63E-04 | 1.60E-04 | 1.60E-04 | 3.96E-08 |
| rs7163259 | 15: 27170985 | T | C | 1.23E-04 | 3.80E-05 | 3.80E-05 | 2.85E-08 |
| rs72712082 | 15: 27190131 | T | C | 2.85E-04 | 8.38E-03 | 8.38E-03 | 4.04E-08 |
| rs4774466 | 15: 63311270 | C | T | 1.84E-04 | 8.60E-04 | 8.60E-04 | 1.87E-08 |
| rs1873148 | 15: 63312603 | G | A | 1.42E-04 | 7.65E-04 | 7.65E-04 | 1.08E-08 |
| rs4374129 | 15: 80599097 | A | T | 1.29E-04 | 3.63E-04 | 3.63E-04 | 1.36E-08 |
| rs8026387 | 15: 80599714 | G | T | 1.73E-04 | 2.01E-04 | 2.01E-04 | 2.72E-08 |
| rs75173599 | 15: 88825383 | T | C | 5.82E-05 | 3.48E-05 | 3.48E-05 | 6.38E-09 |
| rs4497664 | 15: 89261134 | C | T | 5.33E-05 | 1.21E-03 | 1.21E-03 | 3.06E-09 |
| rs7178775 | 15: 91873887 | C | T | 2.37E-04 | 1.09E-04 | 1.09E-04 | 3.27E-08 |
| rs12148732 | 15: 91878532 | G | T | 8.84E-05 | 1.39E-04 | 1.39E-04 | 4.16E-09 |
| rs907026 | 16: 9288453 | T | C | 9.77E-05 | 1.26E-04 | 1.26E-04 | 9.95E-09 |
| rs288603 | 16: 62672079 | C | T | 8.59E-05 | 3.72E-03 | 3.72E-03 | 3.18E-09 |
| rs4795769 | 17: 31679192 | C | T | 2.78E-04 | 7.78E-05 | 7.78E-05 | 4.08E-08 |
| rs34327232 | 17: 65031935 | G | A | 1.35E-05 | 1.89E-05 | 1.89E-05 | 1.17E-10 |
| rs58654875 | 17: 65032026 | G | A | 1.39E-05 | 1.89E-05 | 1.89E-05 | 1.33E-10 |
| rs4790993 | 17: 65035215 | T | C | 1.66E-04 | 2.20E-03 | 2.20E-03 | 1.41E-08 |
| rs79358823 | 18: 10407315 | C | T | 1.57E-04 | 1.47E-03 | 1.47E-03 | 3.15E-08 |
| rs1926075 | 20: 54880817 | C | A | 8.76E-05 | 1.25E-04 | 1.25E-04 | 3.16E-09 |
| (Continued on next page) | | | | | | | |
| **SNPs** | **Chr: Position** | **Allele1** | **Allele2** | **p- value of genetic model** | | | **p-value of  meta-analysis** |
| **Additive** | **Dominant** | **Recessive** |
| rs2837902 | 21: 42388524 | G | A | 2.05E-04 | 2.79E-02 | 2.79E-02 | 2.49E-08 |
| rs117345678 | 22: 29379222 | A | G | 1.09E-04 | 1.92E-04 | 1.92E-04 | 2.95E-08 |


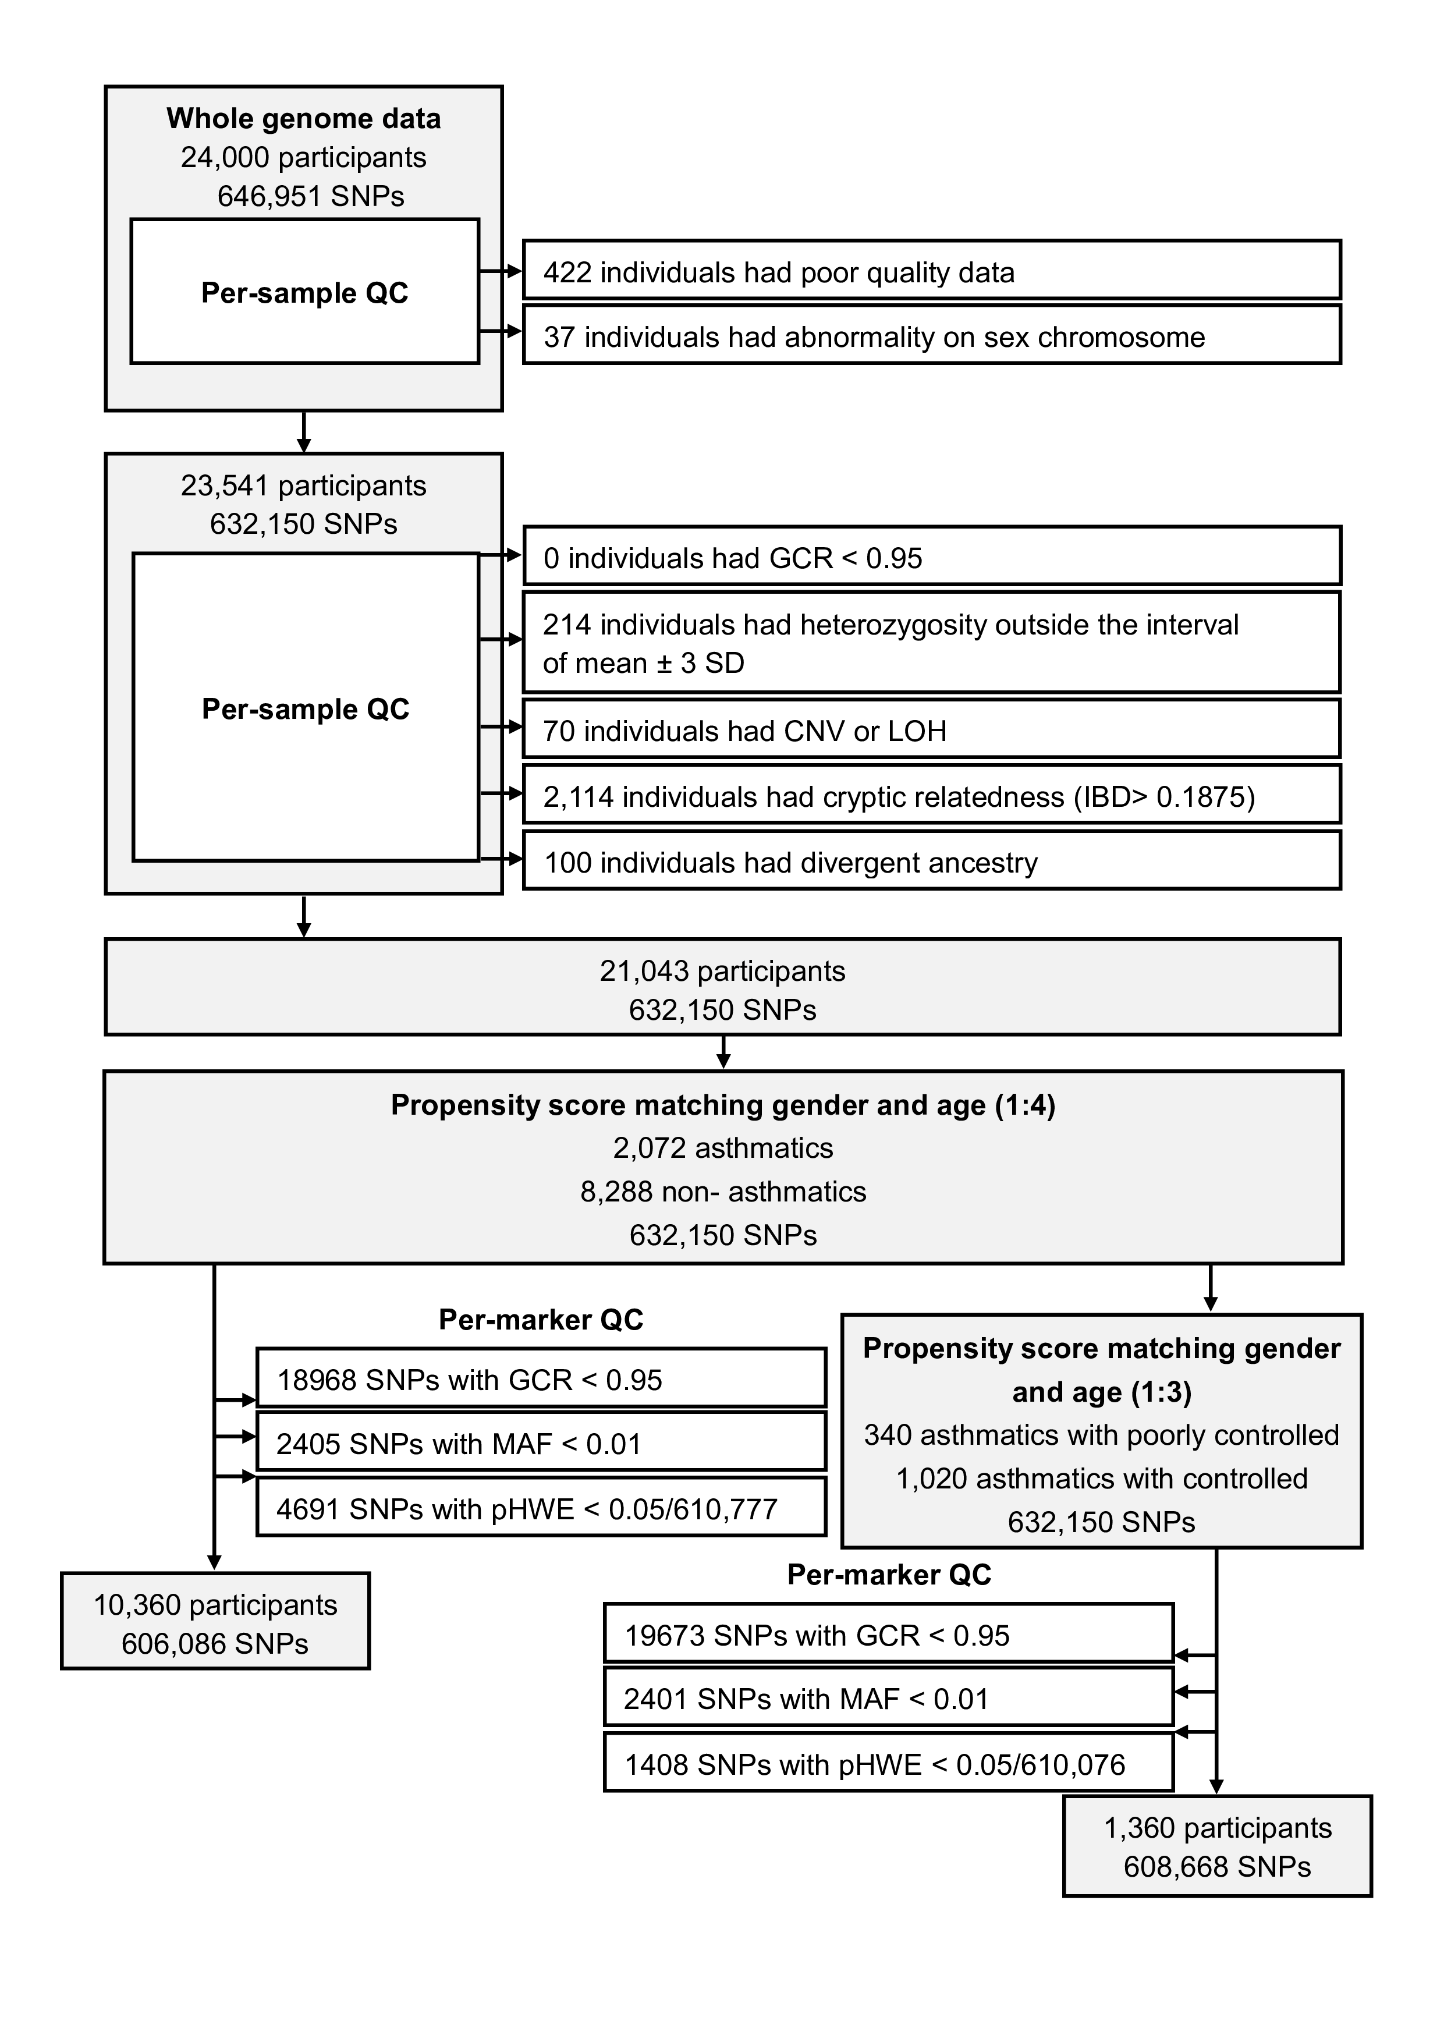


**Figure S1. Quality Control (QC) flow chart**

QC criteria for samples were showed as follows: genotype call-rate (GCR) ≥ 0.95, average heterozygosity within three standard deviations (SD) of the mean, no chromosomal aberrations, identity by descent (IBD) ≤ 0.1875, and no divergent ancestry. The QC for SNPs was established as follows: GCR ≥ 0.95, minor allele frequency (MAF) ≥ 0.01, and Hardy-Weinberg equilibrium (HWE) p ≥ 0.05/ n.

**Abbreviation:** SNP, single-nucleotide polymorphism; SD, standard deviation; GCR, genotyping call rate; CNV, copy number variation; LOH, loss of heterozygosity; IBD, identity by descent; MAF, minor allele frequency; HWE, Hardy–Weinberg equilibrium

1. **Q-Q plot of BMI (b) Q-Q plot of WHtR**


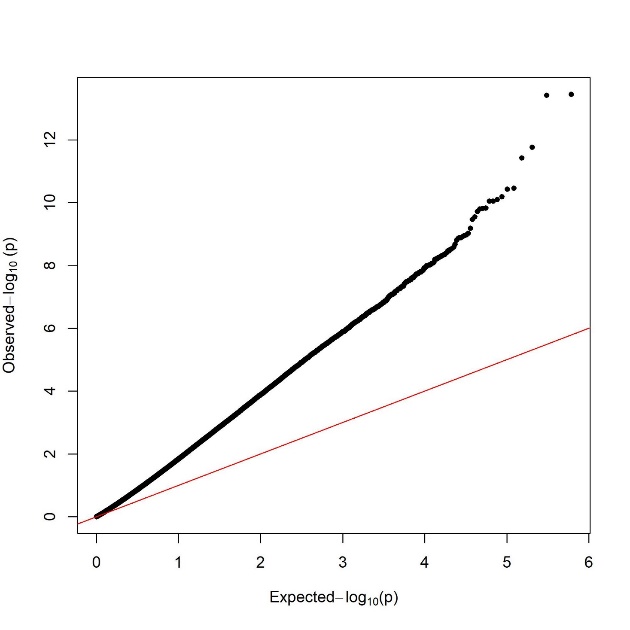

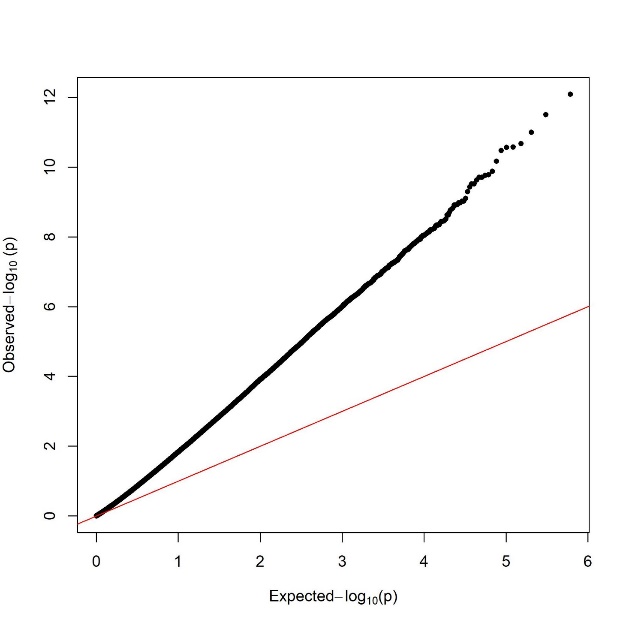


**(c) Manhattan plot of BMI (d) Manhattan plot of WHtR**


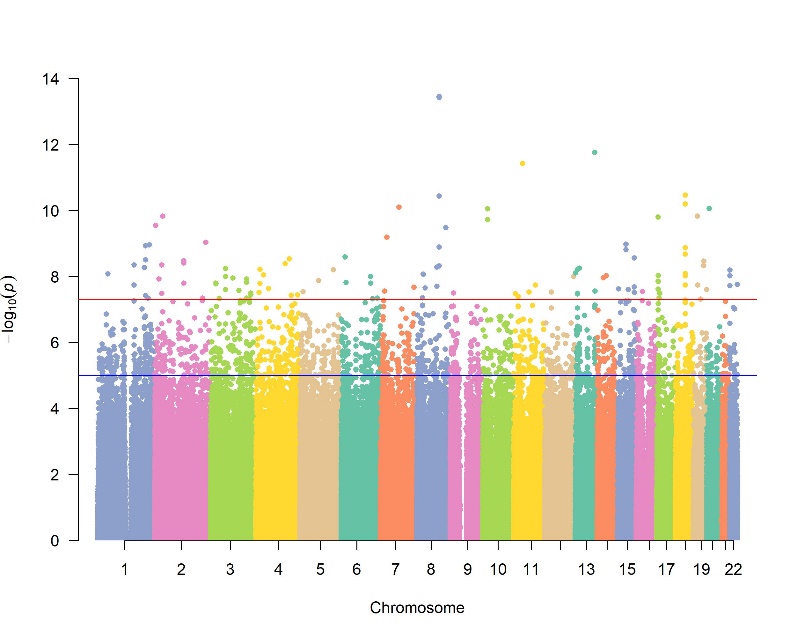

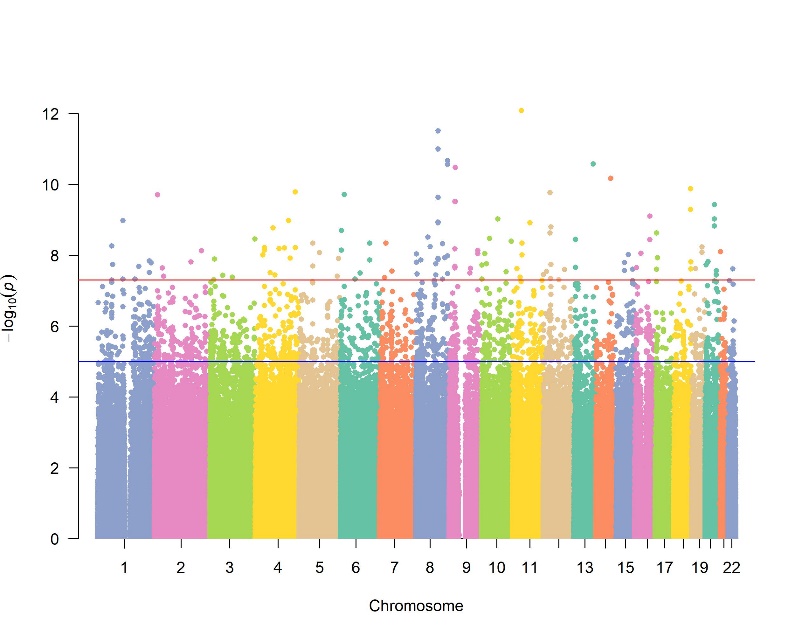


**Figure S2. Q-Q plot and Manhattan plot of the GWAS meta-analyses results for BMI and WHtR**

1. **Q-Q plot**


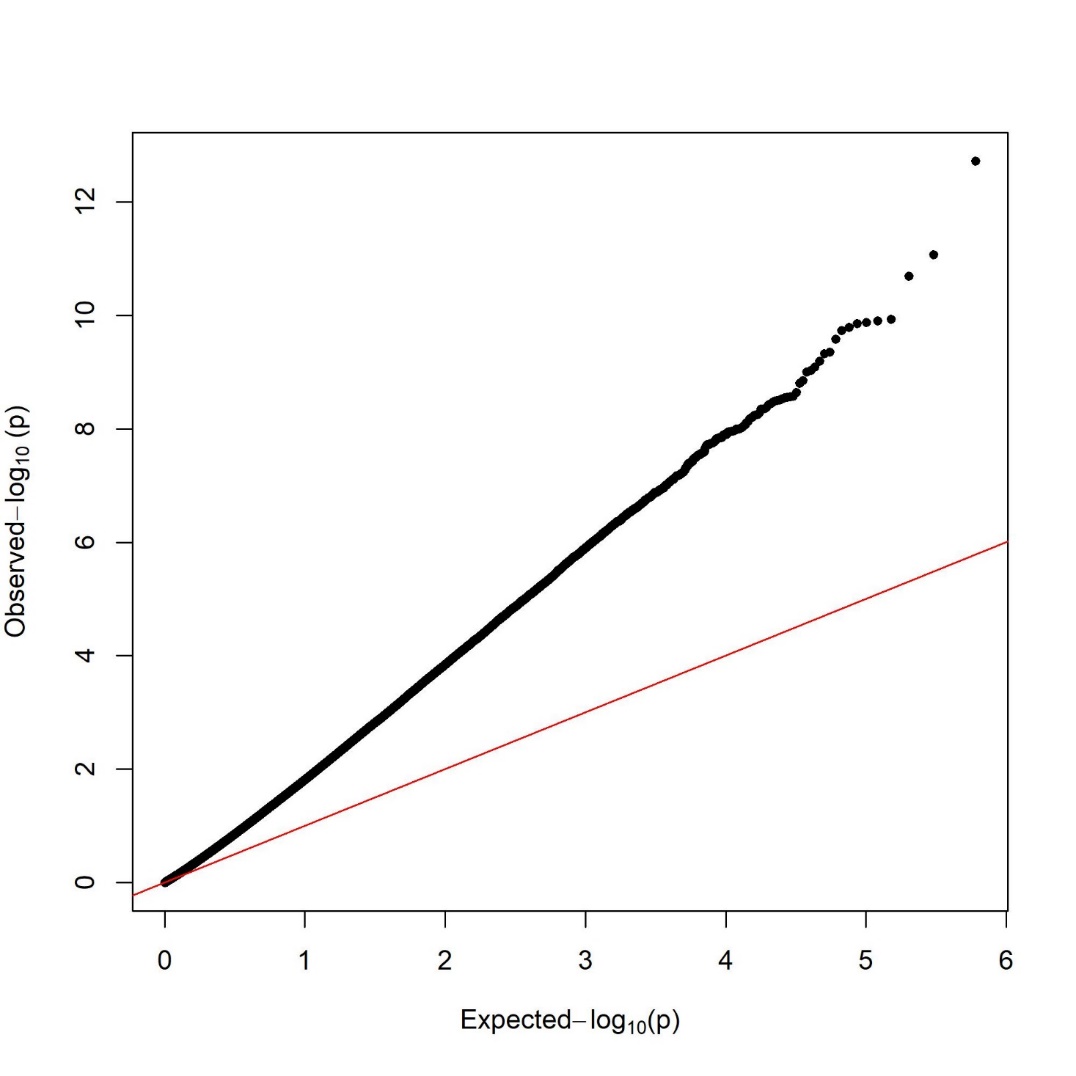


1. **Manhattan plot**


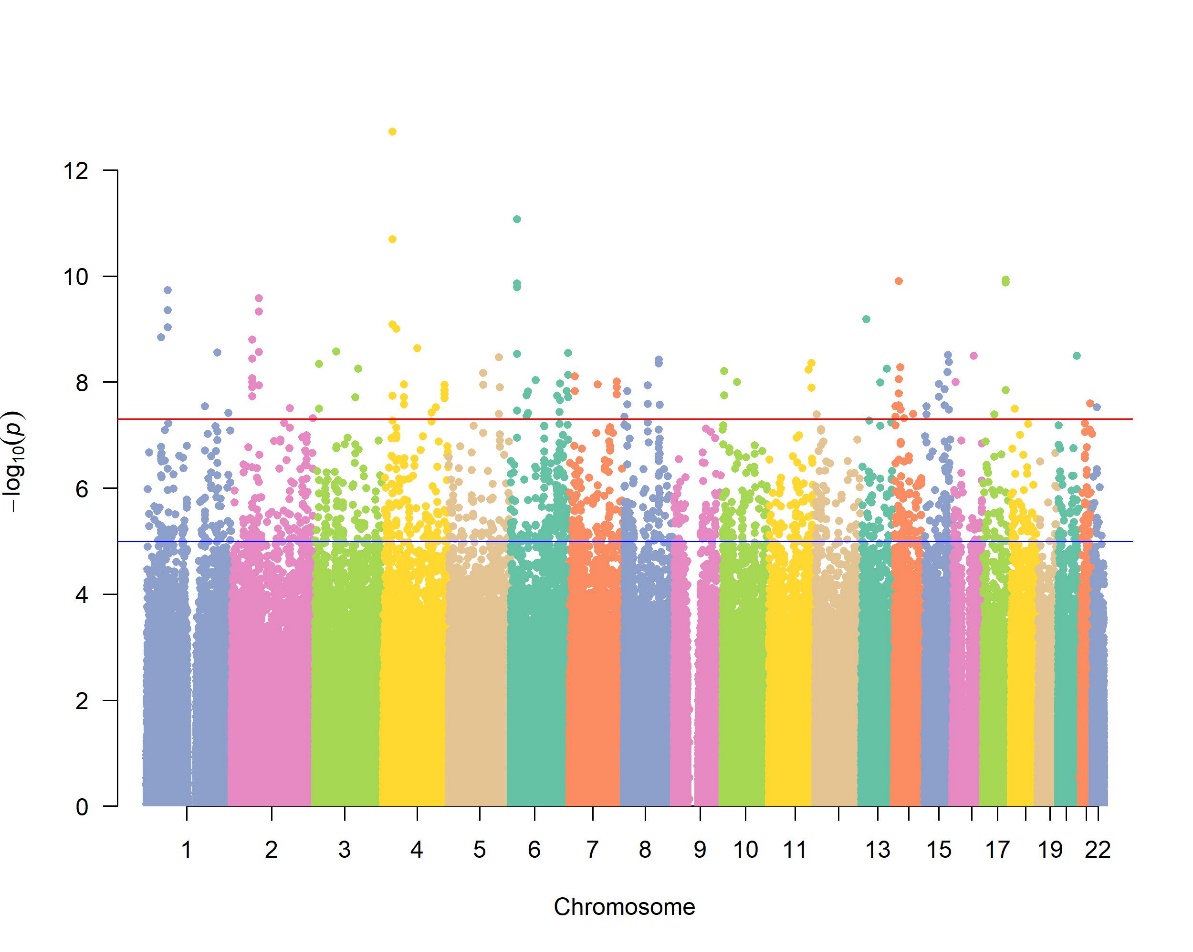


**Figure S3. Q-Q plot and Manhattan plot of the GWAS meta-analyses results for asthma**


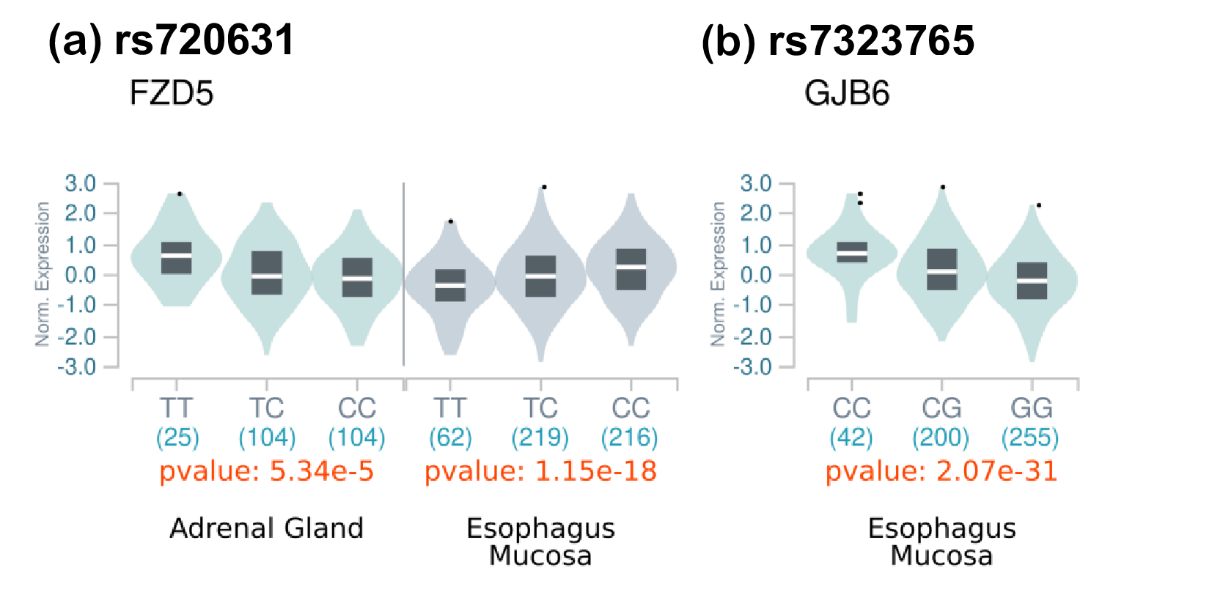


**Figure S4. Expression quantitative trait loci (eQTL) violin plots between genotypes of BMI-associated risk SNPs and gene expression from the Genotype-Tissue Expression (GTEx)**

(a) eQTL effects of rs720631 on FZD5

216 GTEx individuals with the C/C genotype at SNP rs720631 have higher FZD5 gene expression in the esophageal mucosa than the 219 heterozygote (T/C) and 62 major allele homozygote (T/T) GTEx individuals.

(b) eQTL effects of rs7323765 on GJB6

255 GTEx individuals with the G/G genotype at SNP rs7323765 have lower GJB6 gene expression in the esophageal mucosa than the 200 heterozygote (C/G) and 42 major allele homozygote (C/C) GTEx individuals.

**Figure**
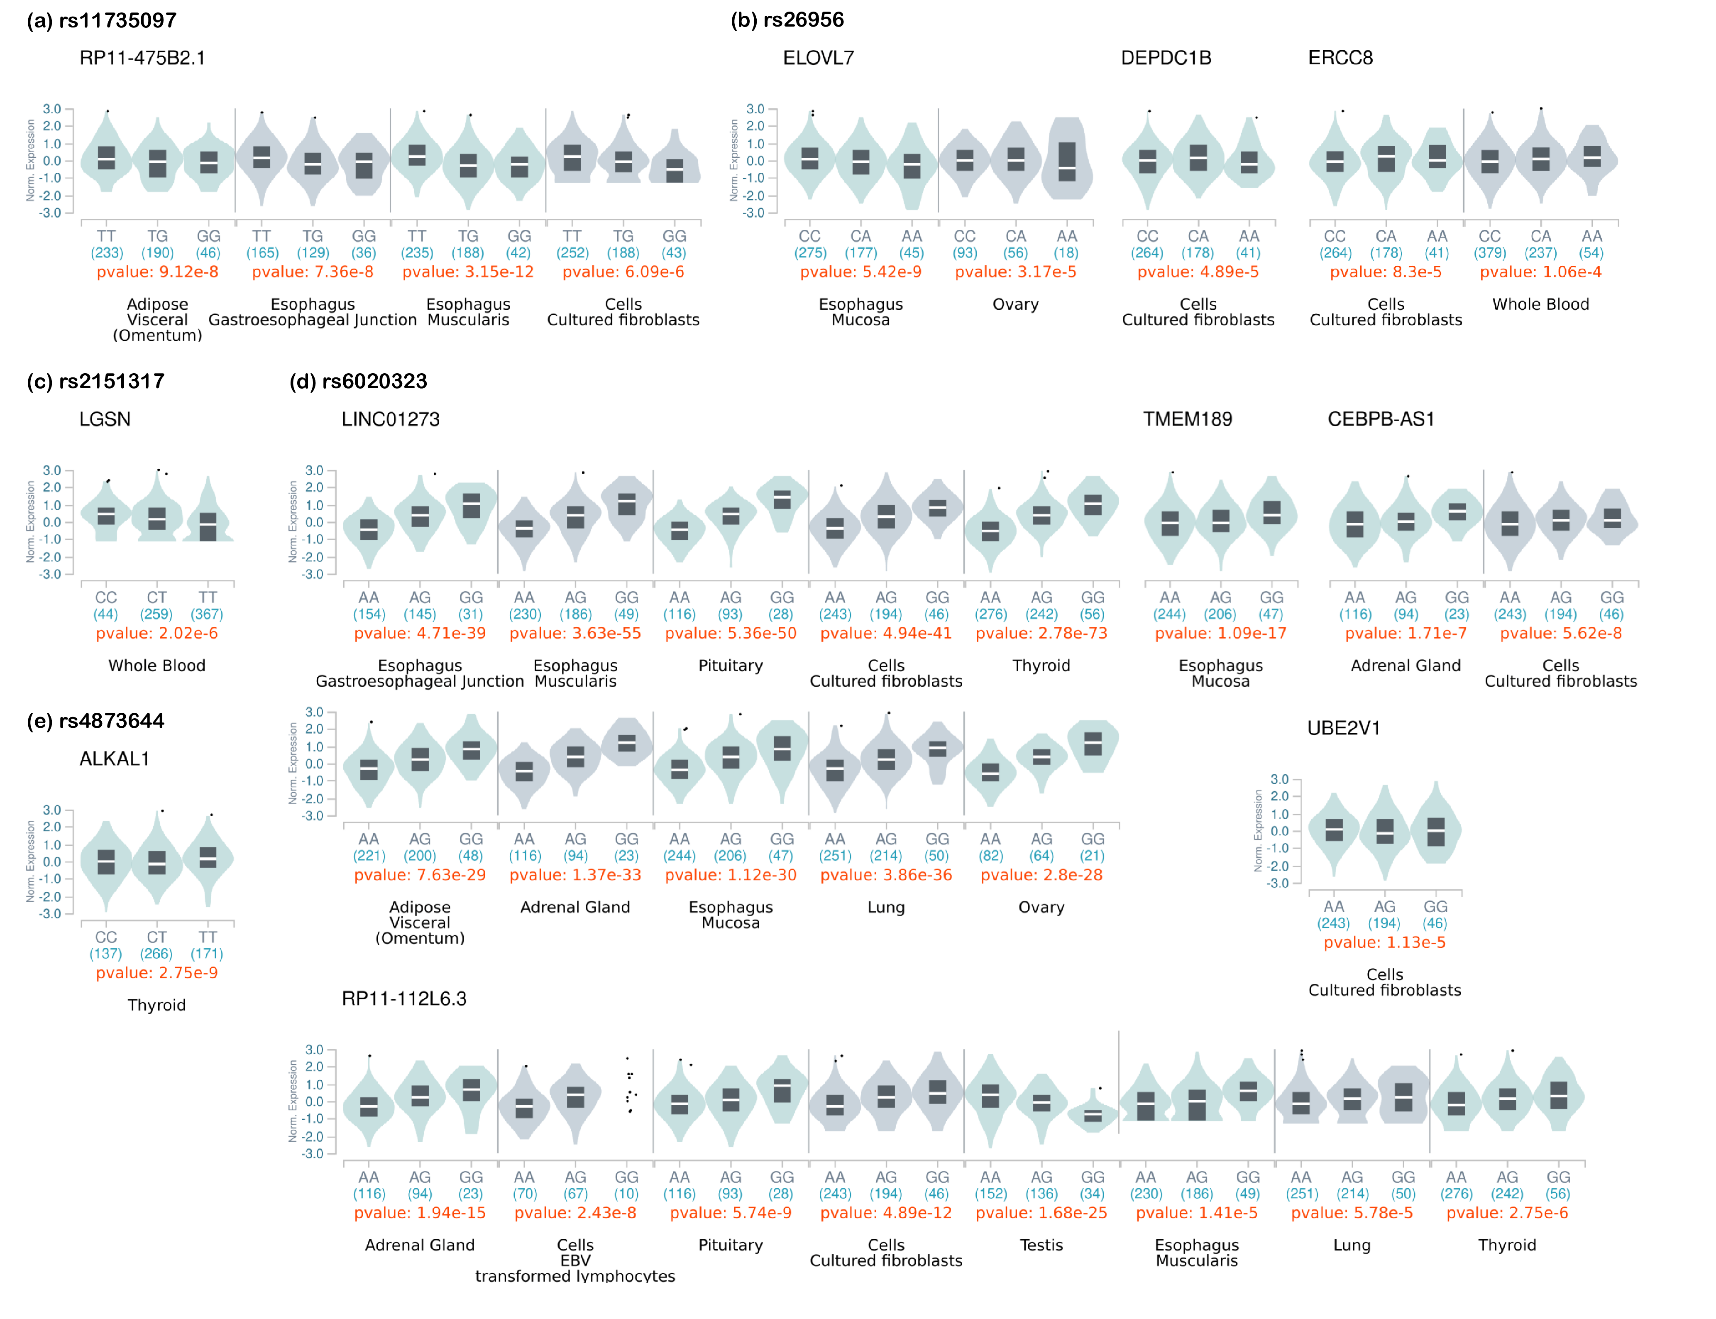
**S5. eQTL violin plots between genotypes of WHtR-associated risk SNPs and gene expression from the GTEx**

(a) eQTL effects of rs11735097 on RP11-475B2.1

(b) eQTL effects of rs26956 on ELOVL7, DEPDC1B, and ERCC8

(c) eQTL effects of rs2151317 on LGSN

(d) eQTL effects of rs6020323 on LINC01273, TMEM189, CEBPB-AS1, UBE2V1, and RP11-112L6.3

(e) eQTL effects of rs4873644 on ALKAL1


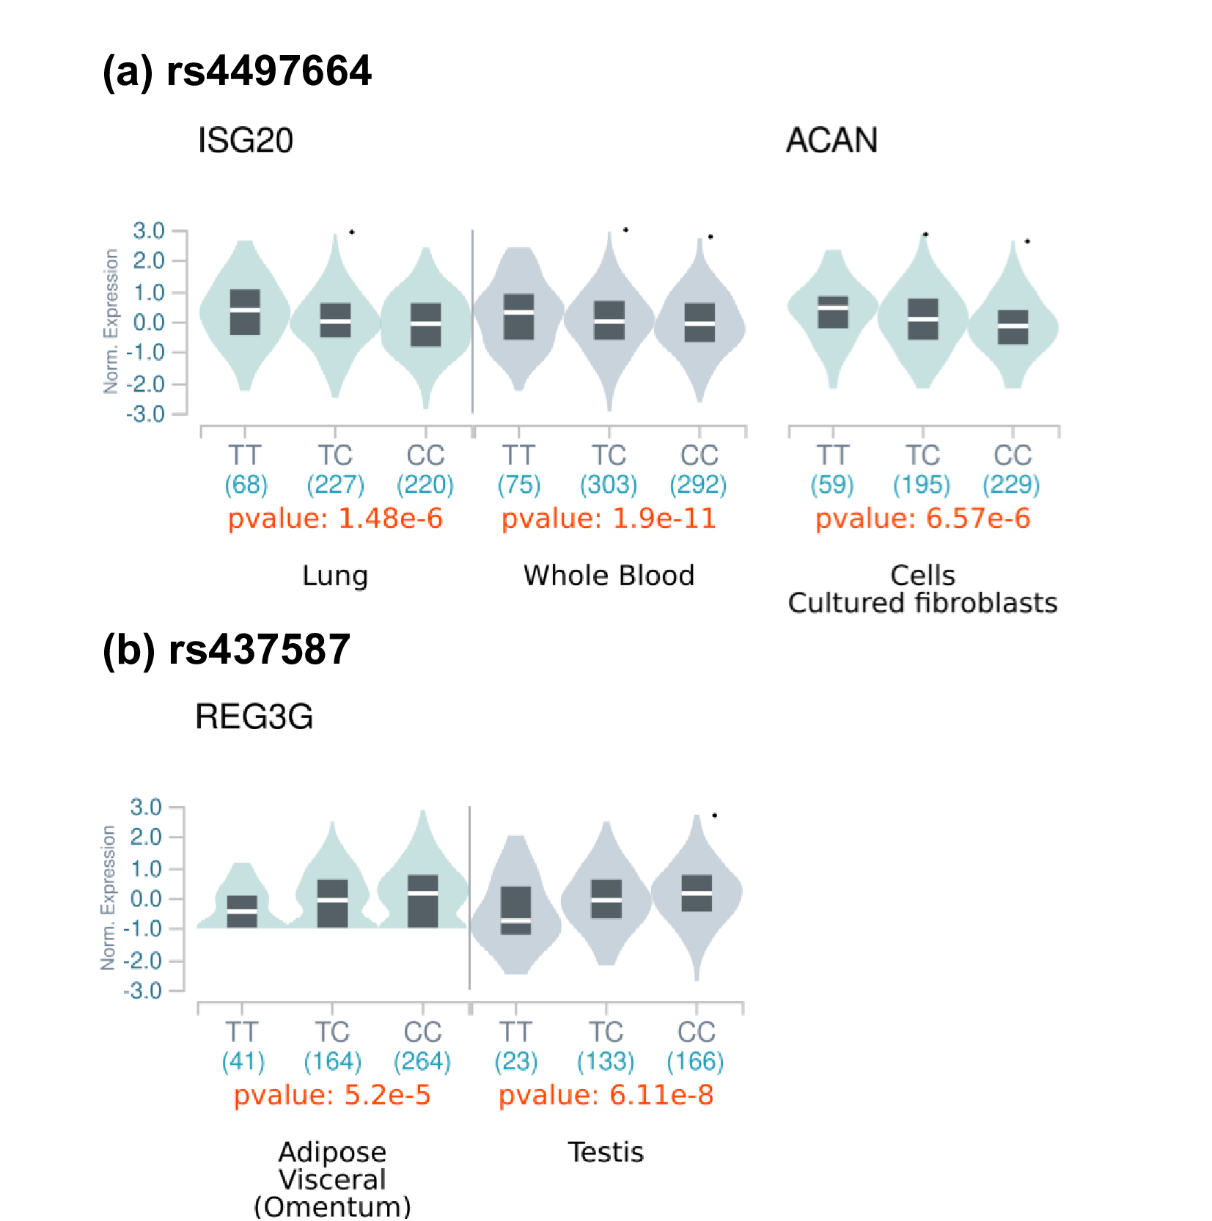


**Figure S6. eQTL violin plots between genotypes of asthma-associated SNPs and gene expression from the GTEx**

(a) eQTL effects of rs4497664 on ISG20 and ACAN

(b) eQTL effects of rs437587 on REG3G


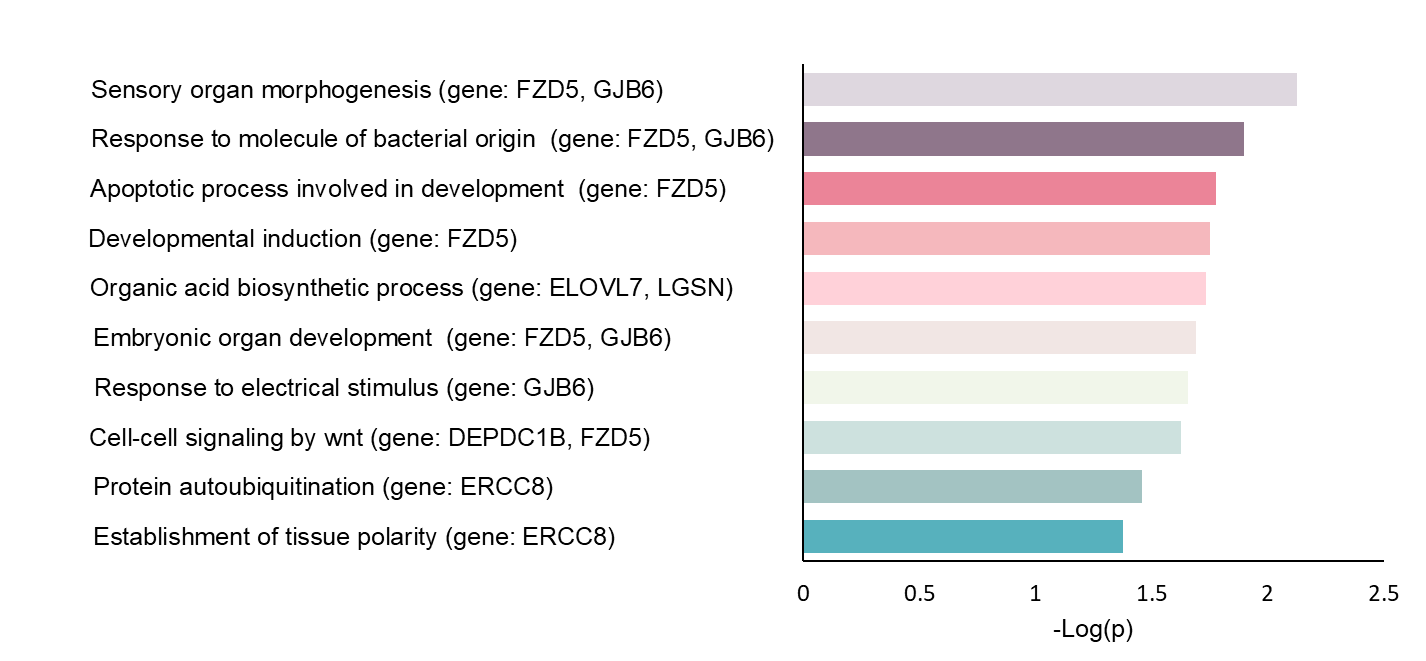


**Figure S7. Top 10 biological process (BP) terms with the highest p-value by gene ontology (GO) enrichment analysis**

The Y- axis was the GO BP terms, and the X- axis was the -Log(P-value). The larger the -Log(P-value), the more significant the BP is (p-value all <0.05, FDR >0.05).

**
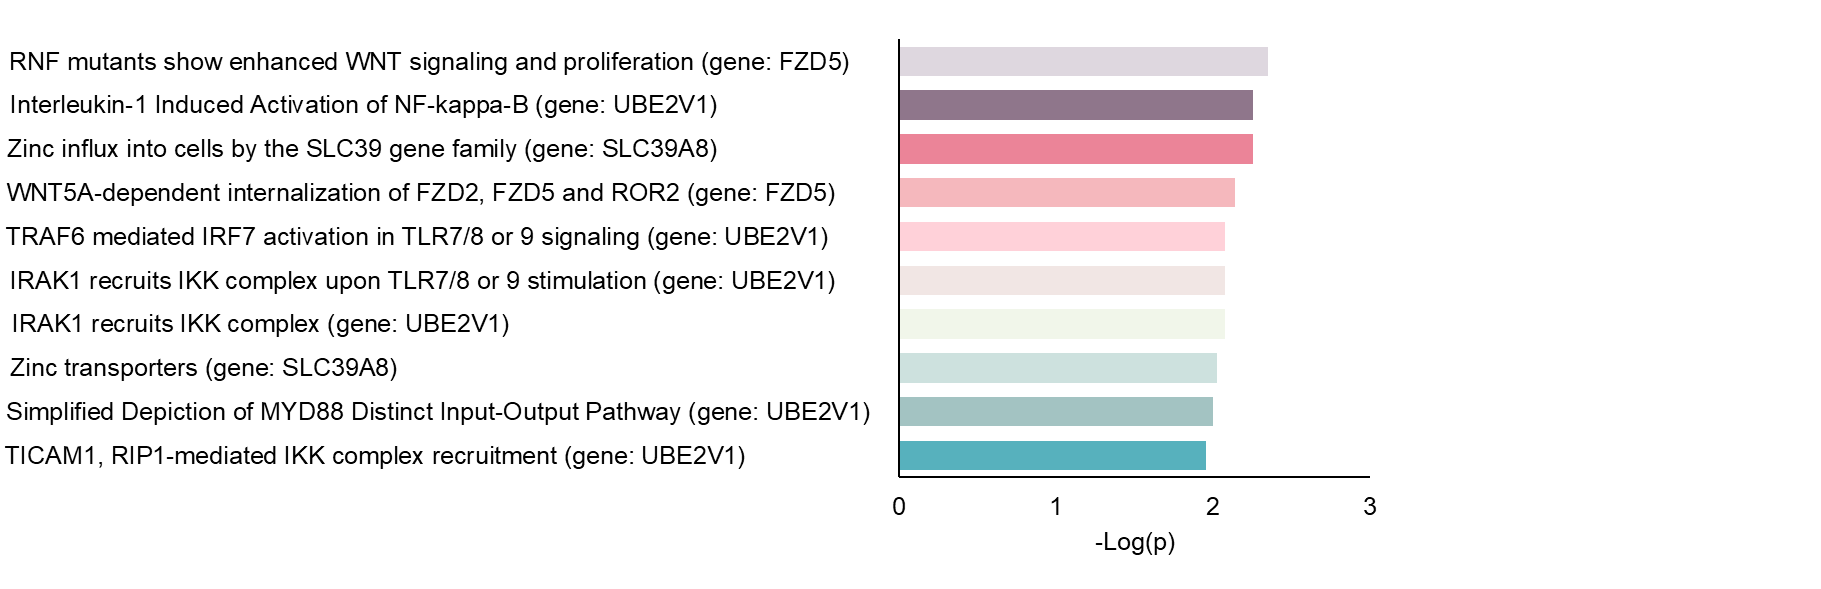
**

**Figure S8. Top 10 pathway with the highest p-value by pathway enrichment analysis**

The Y- axis was the pathway terms, and the X- axis was the -Log(P-value). The larger the -Log(P-value), the more significant the pathway is (top 10, p-value all <0.05, FDR >0.05).

FZD5, UBE2V1, and SLC39A8 genes were involved in immunity and glycosaminoglycan metabolism associated pathways:

1. Immunity pathway:
   1. WNT signaling
      1. Reactome–RNF mutants show enhanced WNT signaling and proliferation
      2. Reactome–WNT5A-dependent internalization of FZD2, FZD5 and ROR2
   2. Toll-like Receptor Cascades
      1. Wikipathway–Simplified Depiction of MYD88 Distinct Input-Output Pathway
      2. Wikipathway–Interleukin-1 Induced Activation of NF-kappa-B
      3. Reactome–IRAK1 recruits IKK complex upon TLR7/8 or 9 stimulation
      4. Reactome–TRAF6 mediated IRF7 activation in TLR7/8 or 9 signaling
      5. Reactome–IRAK1 recruits IKK complex”.
2. zinc ion transmembrane transport pathway:
   1. Reactome–Zinc transporters
   2. Reactome–Zinc influx into cells by the SLC39 gene family

**
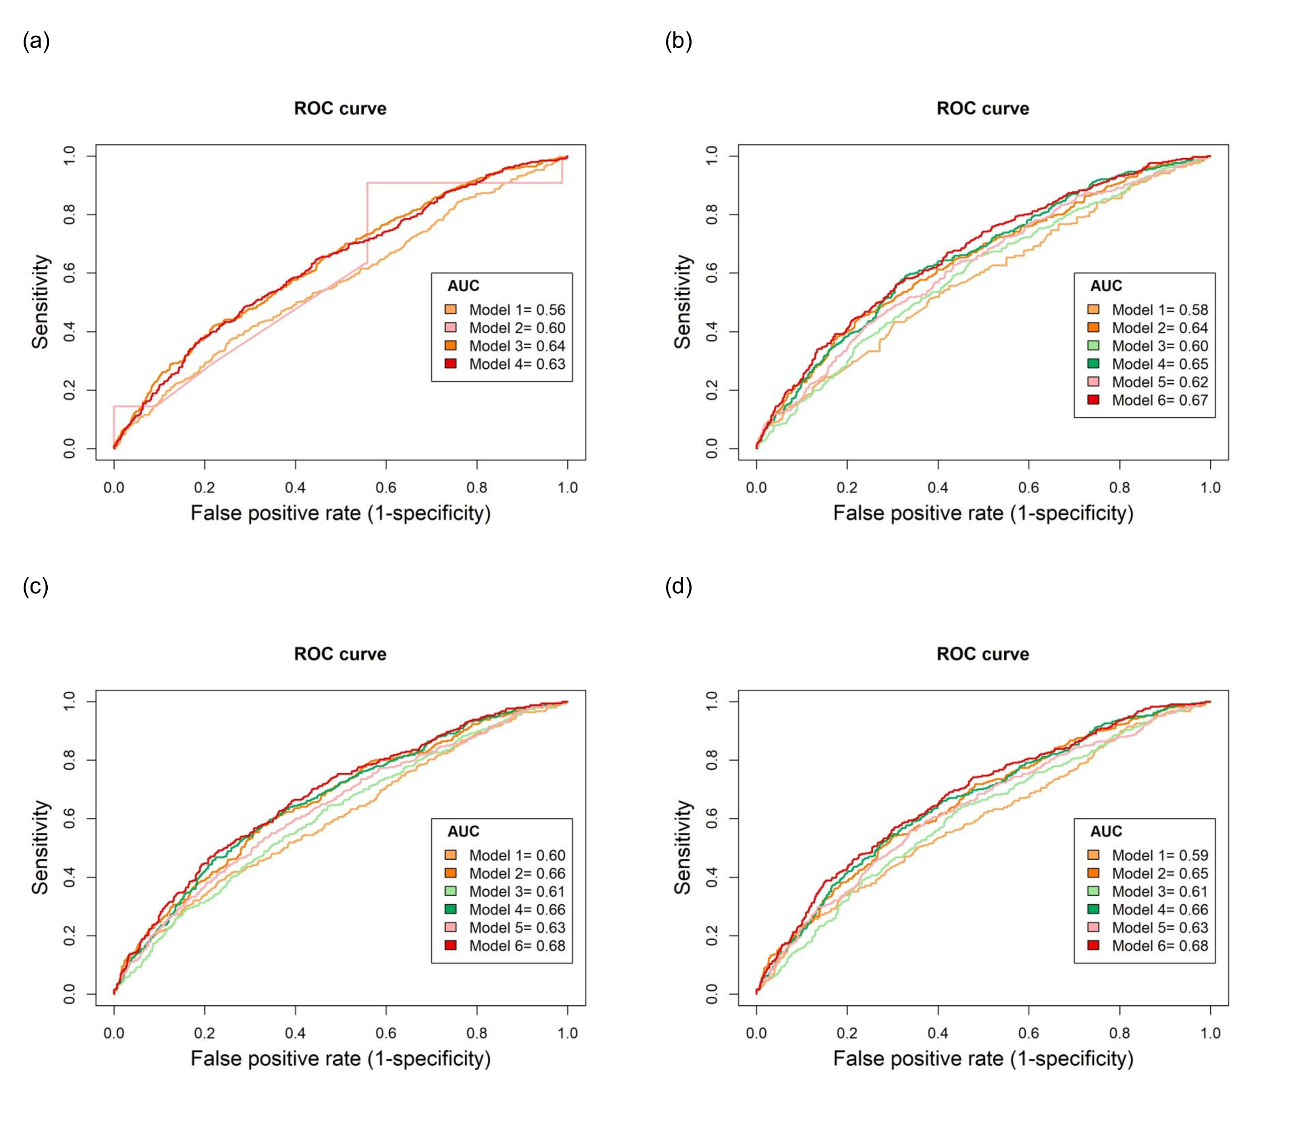
**

**Figure S9. The performance of predictive model of poorly controlled asthma by general obesity (presented as BMI) related traits and genetics scores**

(a) The effect of BMI traits on poorly controlled asthma

Model 1: BMI (continuous)

Model 2: BMI (binary)

Model 3: Model 1+ asthma genetic score+ one of the parents has asthma

Model 4: Model 2+ asthma genetic score+ one of the parents has asthma

(b) The effect of BMI-related genetic score on poorly controlled asthma

Model 1: BMI-related genetic risk score (GRS)

Model 2: Model 1+ asthma genetic score+ one of the parents has asthma

Model 3: BMI-related genetic protective score (GPS)

Model 4: Model 3+ asthma genetic score+ one of the parents has asthma

Model 5: Model 1+ Model3

Model 6: Model 5+ asthma genetic score+ one of the parents has asthma

(c) The effect of BMI and genetic score on poorly controlled asthma

Model 1: BMI (continuous) and BMI-related GRS

Model 2: Model 1+ one of the parents has asthma

Model 3: BMI (continuous) and BMI-related GPS

Model 4: Model 3+ one of the parents has asthma

Model 5: Model 1+ Model 3

Model 6: Model 5+ one of the parents has asthma

(d) The effect of general obesity and genetic score on poorly controlled asthma

Model 1: BMI (binary) and BMI-related GRS

Model 2: Model 1+ asthma genetic score+ one of the parents has asthma

Model 3: BMI (binary) and BMI-related GPS

Model 4: Model 3+ asthma genetic score+ one of the parents has asthma

Model 5: Model 1+ Model 3

Model 6: Model 5+ asthma genetic score+ one of the parents has asthma


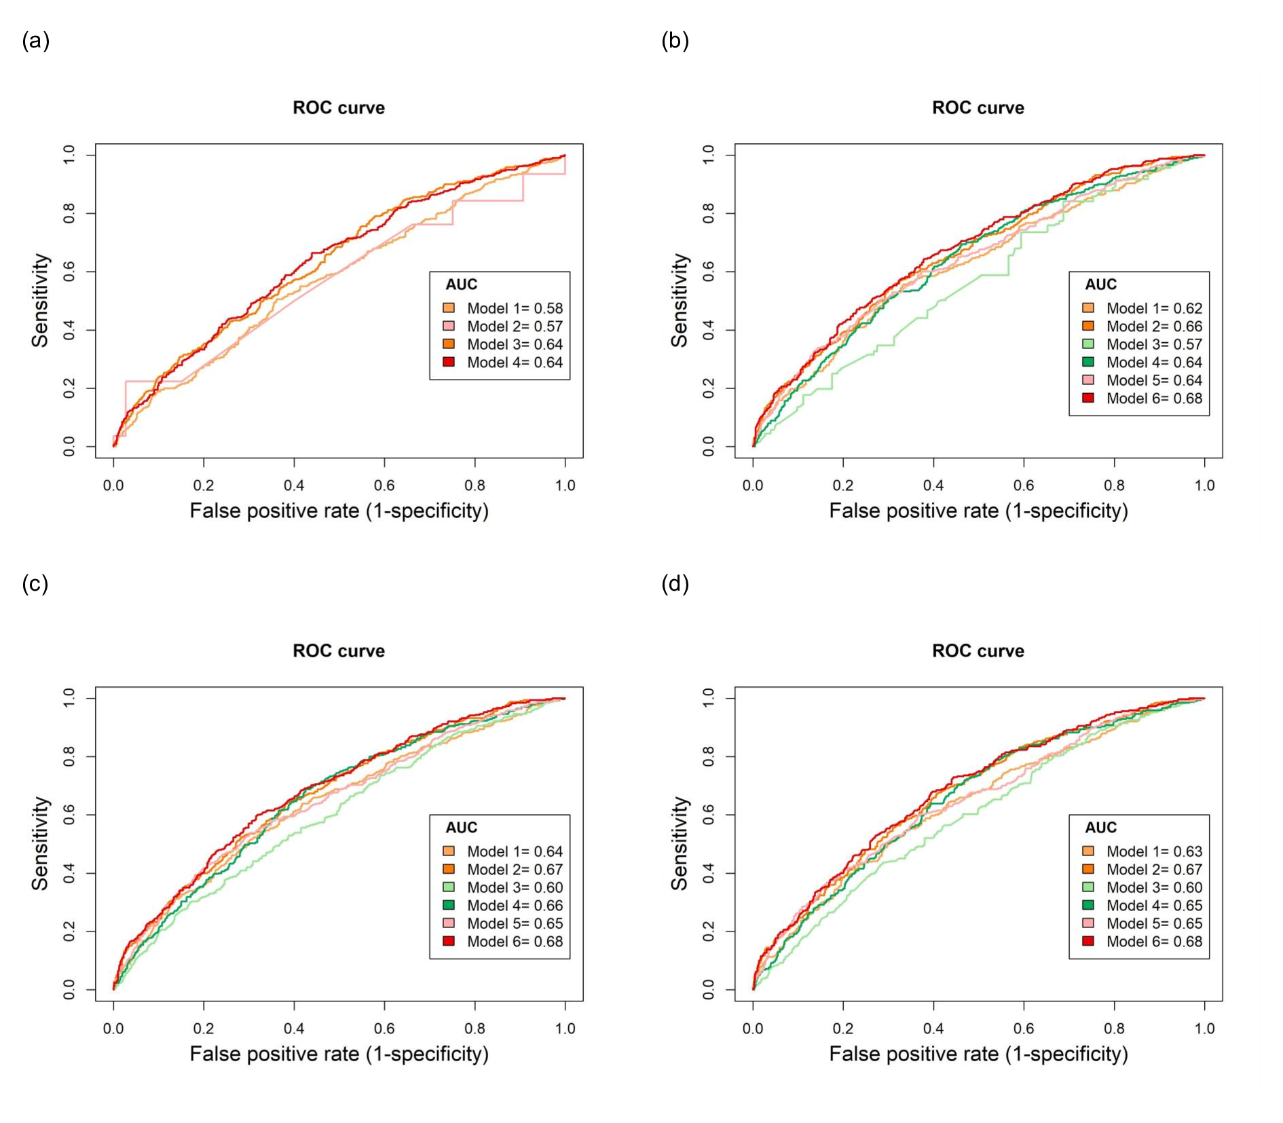


**Figure** **S10. The performance of predictive model of poorly controlled asthma by central obesity (presented as WHtR) related traits and genetics scores**

(a) The effect of WHtR traits on poorly controlled asthma

Model 1: WHtR (continuous)

Model 2: WHtR (binary)

Model 3: Model 1+ asthma genetic score+ one of the parents has asthma

Model 4: Model 1+ asthma genetic score+ one of the parents has asthma

(b)The effect of WHtR-related genetic score on poorly controlled asthma

Model 1: WHtR-related genetic risk score (GRS)

Model 2: Model 1+ asthma genetic score+ one of the parents has asthma

Model 3: WHtR-related genetic protective score (GPS)

Model 4: Model 3+ asthma genetic score+ one of the parents has asthma

Model 5: Model 1+ Model3

Model 6: Model 5+ asthma genetic score+ one of the parents has asthma

(c) The effect of WHtR and genetic score on poorly controlled asthma

Model 1: WHtR (continuous) and WHtR-related GRS

Model 2: Model 1+ asthma genetic score+ one of the parents has asthma

Model 3: WHtR (continuous) and WHtR-related GPS

Model 4: Model 3+ asthma genetic score+ one of the parents has asthma

Model 5: Model 1+ Model 3

Model 6: Model 5+ asthma genetic score+ one of the parents has asthma

(d) The effect of central obesity and genetic score on poorly controlled asthma

Model 1: WHtR (binary) and WHtR-related GRS

Model 2: Model 1+ + asthma genetic score+ one of the parents has asthma

Model 3: WHtR (binary) and WHtR-related GPS

Model 4: Model 3+ asthma genetic score+ one of the parents has asthma

Model 5: Model 1+ Model 3

Model 6: Model 5+ asthma genetic score+ one of the parents has asthma
